# Mitochondrial phosphoproteomes are functionally specialized across tissues

Fynn M. Hansen<sup>1</sup>, Laura S. Kremer<sup>2</sup>, Ozge Karayel<sup>1</sup>, Inge Kühl<sup>3</sup>, Isabell Bludau<sup>1</sup>, Nils-Göran Larsson<sup>2</sup>, Matthias Mann<sup>1</sup>

<sup>1</sup>Department of Proteomics and Signal Transduction, Max Planck Institute of Biochemistry, Martinsried, 82152, Germany

<sup>2</sup>Department of Medical Biochemistry and Biophysics, Karolinska Institutet, 171 77 Stockholm, Sweden.

<sup>3</sup>Department of Cell Biology, Institute of Integrative Biology of the Cell, UMR9198, CEA, CNRS, Université Paris-Saclay, 91190 Gif-sur-Yvette, France

Lead contact: [mmann@biochem.mpg.de](mailto:mmann@biochem.mpg.de)

## Abstract

**Mitochondria are essential organelles involved in critical biological processes such as energy metabolism and cell survival. Their dysfunction is linked to numerous human pathologies that often manifest in a tissue-specific manner. Accordingly, mitochondrial fitness depends on versatile proteomes specialized to meet diverse tissue-specific requirements. Furthermore, increasing evidence suggests that phosphorylation may also play an important role in regulating tissue-specific mitochondrial functions and pathophysiology. We hypothesized that recent advances in mass spectrometry (MS)-based proteomics would now enable in-depth measurement to quantitatively profile mitochondrial proteomes along with their matching phosphoproteomes across tissues. We isolated mitochondria from mouse heart, skeletal muscle, brown adipose tissue, kidney, liver, brain, and spleen by differential centrifugation followed by separation on Percoll gradients and high-resolution MS analysis of the proteomes and phosphoproteomes. This in-depth map substantially quantifies known and predicted mitochondrial proteins and provides a resource of core and tissue**

27 modulated mitochondrial proteins ([mitophos.de](#)). We also uncover tissue-specific repertoires of dozens  
28 of kinases and phosphatases. Predicting kinase substrate associations for different mitochondrial  
29 compartments indicates tissue-specific regulation at the phosphoproteome level. Illustrating the  
30 functional value of our resource, we reproduce mitochondrial phosphorylation events on DRP1  
31 responsible for its mitochondrial recruitment and fission initiation and describe phosphorylation  
32 clusters on MIGA2 linked to mitochondrial fusion.

## 33 Introduction

34 Mitochondria are double-membrane-bound organelles with an essential role in homeostasis of eukaryotic  
35 cells. They are often referred to as the “powerhouse of the cell” due to their prominent function in  
36 bioenergetics. Among many other processes, they are also involved in several biosynthetic processes such  
37 as balancing redox systems, the regulation of metabolic by-products like reactive oxygen species (ROS)  
38 (Spinelli and Haigis, 2018) and hold a central role in cell death (Bock and Tait, 2020). The function and  
39 stability of mitochondria depend on their intrinsic bioenergetics regulation and finely orchestrated  
40 interaction with the cellular microenvironment. Energy conversion via the oxidative phosphorylation  
41 system (OXPHOS) plays an essential role in harvesting energy from ingested nutrients. Moreover, the  
42 morphology of mitochondria within an eukaryotic cell is actively regulated by fusion and fission events  
43 which dynamically modulate their number, size, and localization (Liesa et al., 2009). Regulation of  
44 mitochondrial dynamics also affects the interplay of mitochondria with other cellular structures, such as  
45 the cytoskeleton for active regulation of their localization (Moore and Holzbaur, 2018), and organelles like  
46 the endoplasmic reticulum (ER) and lipid droplets to regulate many physiological processes such as energy  
47 metabolism and ion buffering. The mitochondria-associated membrane (MAM), which is the contact site  
48 of the outer mitochondrial membrane with the ER, comprises a unique set of proteins mediating this  
49 interaction and fine-tune mitochondrial functions with the cellular microenvironment (Kwak et al., 2020;  
50 Nunnari and Suomalainen, 2012). Dysregulation of any of these intricate processes can lead to severe  
51 mitochondrial dysfunctions and diseases, including neurodegenerative diseases, cardiovascular disorders,  
52 myopathies, obesity, and cancers, which can manifest in a cell type- and tissue-specific manner  
53 (Suomalainen and Battersby, 2018).

54 The fitness of mitochondria depends on the production and maintenance of functional as well as versatile  
55 proteomes specialized to carry out a variety of functions within the eukaryotic metabolism and meet

56 diverse cellular and tissue-specific requirements (Kuznetsov et al., 2009). The mitochondrial proteome  
57 includes over a thousand proteins (see below), but only a small fraction of 13 proteins are encoded on the  
58 circular mitochondrial DNA molecule (Anderson et al., 1981). Thus, the majority of mitochondrial proteins  
59 are encoded by the nuclear genome, synthesized outside of mitochondria and subsequently imported into  
60 the organelle, implying that mechanisms controlling mitochondrial protein quality (e.g., correct protein  
61 folding and import) are essential for health and integrity of mitochondria (Jadiya and Tomar, 2020).  
62 Furthermore, investigations of mitochondrial dynamics and functional plasticity have revealed regulatory  
63 roles for post-translational modifications (PTMs), including phosphorylation (Niemi and Pagliarini, 2021).  
64 Studies have shown that phosphorylation of several mitochondrial proteins is involved in the regulation  
65 of central processes such as metabolic function, for instance through phosphorylation of the E1alpha  
66 subunit of PDH (Patel et al., 2014), mitophagy (Kolitsida et al., 2019) and fission (Cribbs and Strack, 2007;  
67 Ducommun et al., 2015; Lewis et al., 2018; Taguchi et al., 2007; Toyama et al., 2016). Thus, deregulation  
68 of protein phosphorylation might be an important underlying feature of mitochondrial physiology and  
69 pathophysiology. Currently, there is a significant knowledge gap of the mitochondrial variable proteomic  
70 composition and to what extent it is phosphorylated in a tissue-specific manner and how post-  
71 translational regulation influences organelle function. A detailed understanding of the functional  
72 specialization of mitochondria at the protein and phosphorylation levels is needed to elucidate the  
73 contribution of mitochondria to health and disease.

74 Large-scale mass spectrometry (MS)-based quantitative proteomics studies from our and other groups  
75 have already shed light on the proteomic composition of mitochondria of various mammalian tissues and  
76 cell types, mostly highlighting that the majority of proteins are shared between mitochondria of different  
77 tissues (Forner et al., 2006; Mootha et al., 2003; Pagliarini et al., 2008). The breadth and depth of such  
78 studies has been largely driven by technological advances in the field in combination with improvements  
79 of mitochondria isolation procedures, such as differential centrifugation (DC), DC in conjunction with

80 ultracentrifugation on e.g. Percoll gradients, magnetic bead-assisted methods (MACS) (Kappler et al.,  
81 2016) or MitoTags (Bayraktar et al., 2019). Efforts in defining the mitochondrial proteome lead to  
82 databases like MitoCarta2.0 and IMPI (<http://impi.mrc-mbu.cam.ac.uk/>), both integrated in Mitominer4.0  
83 (Smith and Robinson, 2019). A recent quantitative and high confidence proteome of human mitochondria  
84 identified 1134 different proteins that vary over six orders in magnitude in abundance (Morgenstern et  
85 al., 2021). Similarly, efforts have been undertaken to map the mitochondrial phosphoproteome, and  
86 identified dozens to hundreds of phosphorylation sites on mitochondrial proteins (listed in Supplementary  
87 Table 1). However, there has been a dramatic improvement in the technology of phosphoproteomics  
88 workflows during the last years, leading to the routine identification and quantification of thousands of  
89 phosphorylation sites in cell culture and in vivo systems (Bekker-Jensen et al., 2020; Humphrey et al.,  
90 2018) which had not been available in earlier studies. Furthermore, comparisons between mitochondrial  
91 phosphoproteomes have been difficult because only a single or a few tissues were analyzed. This  
92 complicates the combination and comparison of data sets across studies to obtain a clear view of  
93 mitochondrial diversity on proteome and phosphoproteome levels. Thus, a concerted effort is needed to  
94 systematically and quantitatively profile mitochondrial proteomes together with their matching  
95 phosphoproteomes from the same biological source. This would further help to investigate the dynamic  
96 composition of mitochondria and help identify the tissue-specific repertoire of mitochondria-resident  
97 kinases and phosphatases and their substrate associations.

98 Here we performed a systematic analysis of the mitochondrial composition at the level of proteins, major  
99 functional entities, and phosphorylation in seven mouse tissues – brain, brown adipose tissue (BAT), heart,  
100 kidney, liver, skeletal muscle (SKM), and spleen. Our study employs state of the art MS-based proteomics  
101 technology to systematically map divergent composition and phosphorylation of mitochondria between  
102 tissues and provides functionally valuable insights into their proteome and post-translational regulations.  
103 This study contributes to our understanding of tissue-specific mitochondrial processes controlled by

104 protein abundance and phosphorylation and helps to manipulate these in health and disease. Our  
105 mitochondrial (phospho)proteomes are composed into an extensive resource and made freely accessible  
106 via [mitophos.de](http://mitophos.de).

## 107 Results

### 108 Comprehensive mitochondria proteome coverage across various mouse tissues

109 To advance our understanding of tissue-specific functional specializations of mitochondria at the protein  
110 level, we set out to characterized proteomes of mitochondria collected from various mouse tissues by LC-  
111 MS/MS analysis. To this end, we first isolated mitochondria from seven tissues – brain, brown adipose  
112 tissue (BAT), heart, kidney, liver, skeletal muscle (SKM), spleen - from six 18-21 weeks old C57BL/6N mice  
113 (three females and three males). Mouse tissues were homogenized with a Dounce homogenizer, and  
114 crude mitochondria were isolated via differential centrifugation and subsequently purified on a Percoll  
115 density gradient to obtain ultra-pure mitochondria isolates (Kuhl et al., 2017). Importantly, this procedure  
116 was shown to efficiently exclude contaminations from other cellular compartments (Wieckowski et al.,  
117 2009). Proteomes of these ultra-pure mitochondrial samples were acquired by a state-of-the-art  
118 proteomics workflow (Figure 1A), allowing the robust identification and quantification (coefficient of  
119 variation (CV) < 20%) of proteins that covered a dynamic range of more than five orders of magnitude  
120 (Supplementary File 1).

121 In total, we identified over 7000 proteins of which 1620 were annotated as mitochondrial proteins using  
122 MitoCarta3.0 (Rath et al., 2021) and the IMPI (<http://impi.mrc-mbu.cam.ac.uk/>) database. This essentially  
123 covers (92%) the mitochondrial proteome by the measure of MitoCarta3.0 and even in the IMPI database,  
124 which also includes predicted mitochondrial proteins, we still identified 62% (Figure 1B). For further  
125 analysis, we filtered for proteins identified in more than half of the biological replicates in at least one  
126 tissue, which resulted in 1548 mitochondrial proteins. This still represents over 90% of MitoCarta3.0 and  
127 59% of the IMPI databases and highlights the deep and reproducible mitochondrial proteome coverage  
128 of this study (Figure 1C). Interestingly, half of these mitochondrial proteins were identified across all  
129 tissues while only 9% were exclusively detected in one specific tissue (Figure 1C), confirming previous

130 reports on mitochondrial proteomes by us and others (Calvo and Mootha, 2010; Forner *et al.*, 2006;  
131 Johnson *et al.*, 2007; Mootha *et al.*, 2003). Of these, almost half (65 proteins) were both reproducibly  
132 identified and not in the lowest 20% of ranked abundances (Supplementary File 2), making them clear  
133 candidates for tissue specific mitochondrial proteins. A similar proportion of the mitochondrial proteome  
134 was also exclusive to two or more tissues by the same criterion.

135 Mitochondrial enrichment efficiency can be determined by the proportion of summed signal intensity for  
136 mitochondrial proteins in relation to all identified proteins in measured samples (Williams *et al.*, 2018).  
137 Applying this strategy, we determined the proportions to be very high (>95%) for liver, kidney, SKM, heart  
138 and BAT, but lower for brain (65%) and spleen (45%) (Figure 2A). These trends are consistent with the  
139 established literature (Fecher *et al.*, 2019; McLaughlin *et al.*, 2020; Roberts *et al.*, 2021; Williams *et al.*,  
140 2018) and can likely be explained by the high tissue heterogeneity of brain (Fecher *et al.*, 2019; Menacho  
141 and Prigione, 2020) and spleen. Indeed, spleen tissue consists of various types of immune cells (Lewis *et al.*,  
142 2019), which might impede high purity enrichment of its organelles. For brain, contaminations by  
143 synaptosomes, which themselves contain neuronal mitochondria, have frequently been observed  
144 (Mootha *et al.*, 2003). Yet, correlation of both mitochondrial and all identified proteins between biological  
145 replicates yielded Pearson correlation coefficients higher than 95% in all tissues (Figure 2B and Figure 2-  
146 figure supplement 1A). Principle component analysis (PCA) further shows that biological replicates cluster  
147 together and underlines functional similarities between tissues such as heart and SKM as well as tissue  
148 related diversity of mitochondria proteomes (Figure 2C and Figure 2-figure supplement 1B).

149



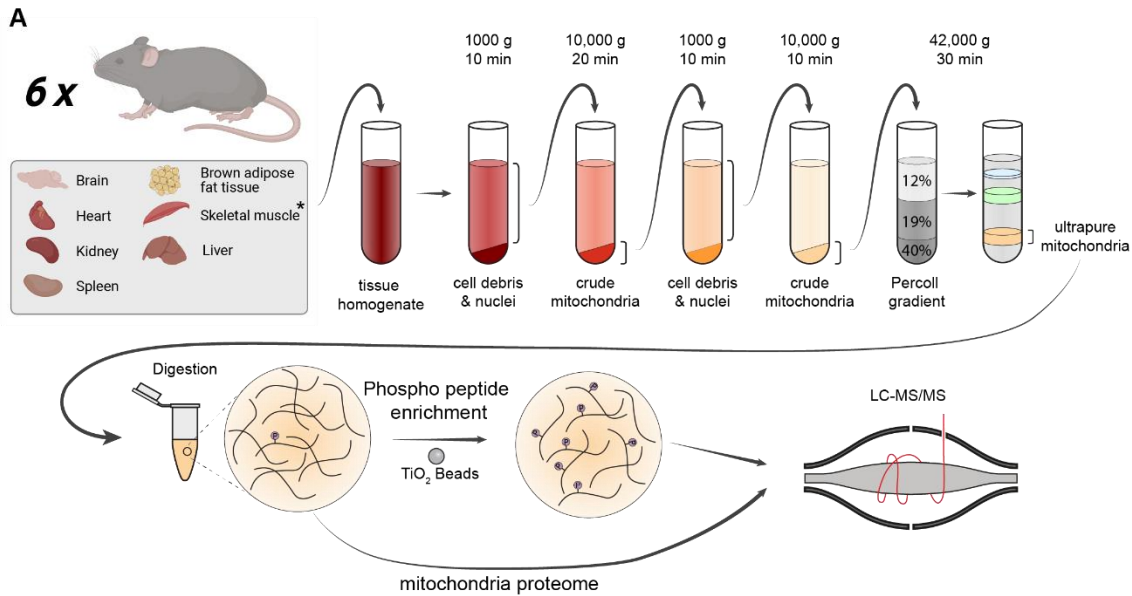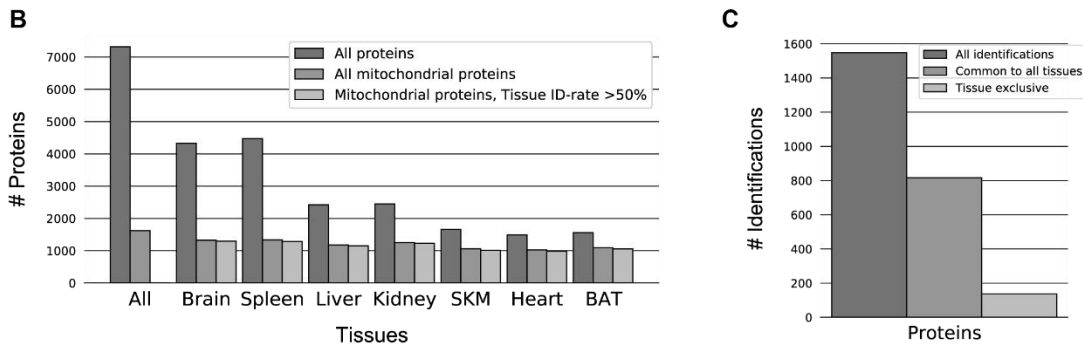

150

151 **Figure 1 Mitochondrial proteome and phosphoproteome preparation**

152 (A) Workflow of tissue preparations for mitochondrial proteome and phosphoproteome enrichment, and LC-MS/MS analysis  
 153 (n=6). Tissues were first homogenized (\* for skeletal muscle, see Methods), crude mitochondria were isolated and ultrapure  
 154 mitochondria were obtained using a Percoll gradient. Proteins were digested and prepared for phosphoproteome analysis via  
 155 TiO<sub>2</sub> enrichment or subjected to LC-MS/MS. (B) Distinct protein identification across biological replicates (n=6). Annotation of  
 156 proteins as mitochondrial is based on MitoCarta3.0 and the IMPI database. (C) Mitochondrial protein numbers after filtering  
 157 for mitochondrial proteins identified in at least 50% of biological replicates (n=6) in at least one tissue. Skeletal muscle (SKM),  
 158 brown adipose tissue (BAT). See also Figure 1 – Source Data 1.

159

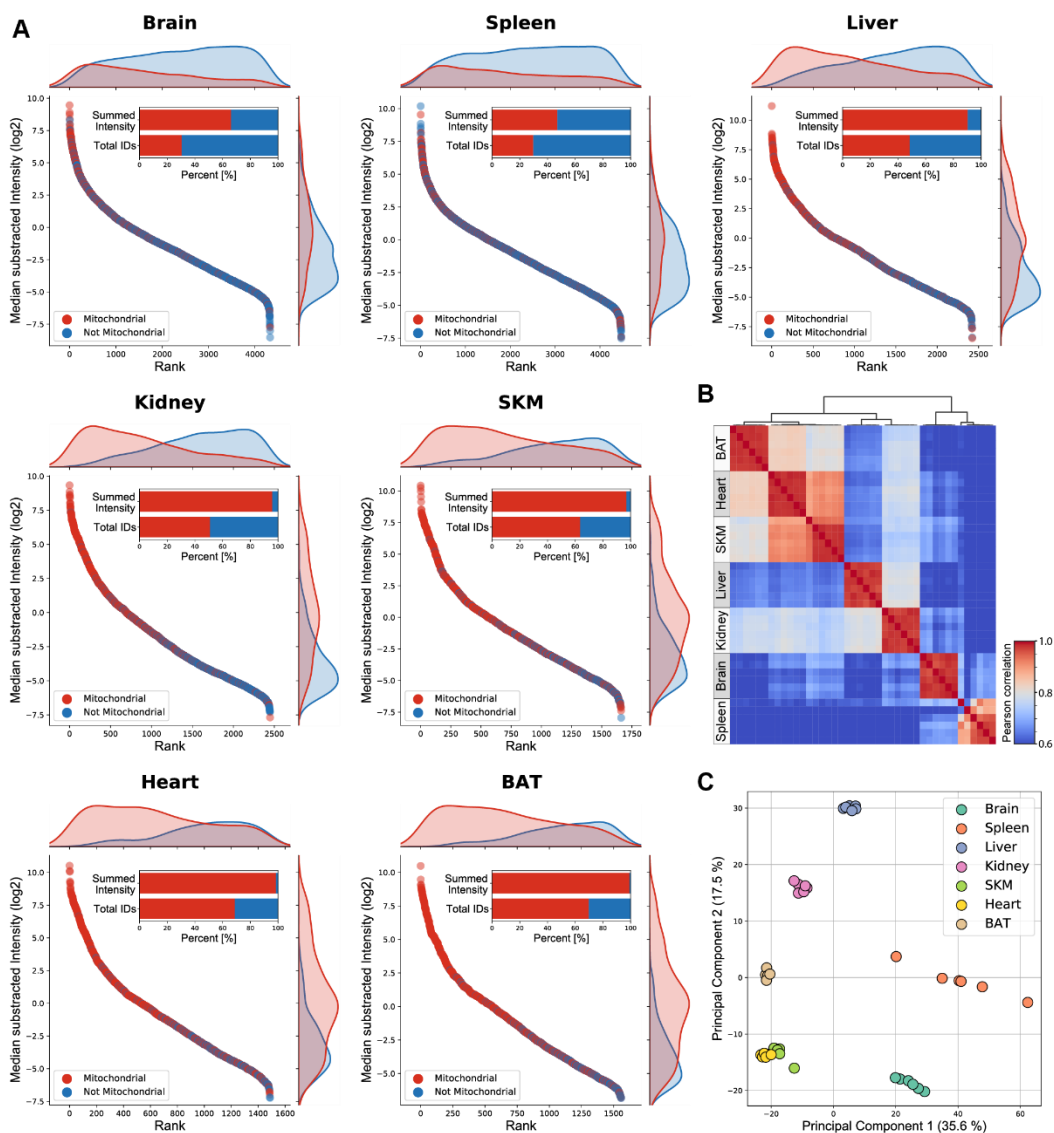

160

161 **Figure 2 Mitochondria enriched samples show tissue-specific clustering**

162 (A) Mitochondrial (red) and not mitochondrial (blue) proteins identified, based on the MitoCarta3.0 and IMPI database, are  
 163 ranked by their intensity for each individual tissue. Histograms on the top and right display the distribution of mitochondrial  
 164 (red) and not mitochondrial (blue) proteins along the rank and the Intensity axis, respectively. The percentage of all identified  
 165 mitochondrial (red) and not mitochondrial (blue) proteins and their summed intensities are displayed in bar graphs. (B)  
 166 Heatmap showing Pearson correlation coefficient for biological replicates (n=6) for mitochondrial proteins of all mitochondrial  
 167 enriched samples. (C) Principal component analysis of mitochondrial proteins of all acquired biological replicates (n=6). Skeletal  
 168 muscle (SKM), brown adipose tissue (BAT). See also Figure 2 – Source Data 1.

## 169 Mitochondrial proteome composition reveals tissue-specific functions

170 To gain further insights into tissue-specific functional differences in mitochondria, we investigated  
171 differences in the composition of mitochondrial proteomes across tissues. First, we focused on the  
172 oxidative phosphorylation (OXPHOS) system, which is essential for production of the energy-rich  
173 metabolite ATP and other processes like free radical generation and apoptosis (Huttemann et al., 2007).  
174 We found that proteins of the electron transport chain (Complex I – Complex IV) and ATP-synthase  
175 (Complex V) displayed high abundances in heart and SKM tissues, supporting the physiological  
176 requirement of high ATP levels in both muscular tissues to sustain processes like muscle contraction  
177 (Ferreira et al., 2010; Ventura-Clapier et al., 2011) (Figure 3A). Conversely, levels of Complex V proteins  
178 were substantially lower in mitochondria from BAT compared to all other measured tissues (Figure 3A),  
179 which agrees with the specialized function of BAT in non-shivering thermogenesis (Jastroch et al., 2010;  
180 Kajimura and Saito, 2014; Oelkrug et al., 2015). This was further supported by the high abundance of the  
181 uncoupling protein 1 (UCP1) in our proteome measurements, the key mediator of the heat-generating  
182 proton leak in the mitochondria of BAT (Figure 3B).

183 In contrast to the well described UCP1, several other members of the SLC25 family remain uncharacterized  
184 (Ruprecht and Kunji, 2020). In our dataset, we identified a total of 47 members of the SLC25 family (Kunji  
185 et al., 2020). We found that levels of SLC25A23 and SLC25A25, two ATP-Mg<sup>2+</sup>/P<sub>i</sub> carrier paralogues, (del  
186 Arco and Satrustegui, 2004; Fiermonte et al., 2004), displayed high abundance in mitochondria of brain  
187 tissue (Figure 3C and Figure 3D). Interestingly, knockout of SLC25A23 was shown to increase neuronal  
188 vulnerability (Rueda et al., 2015), which corroborates our observation and suggests an important role of  
189 SLC25A25 in this tissue type. We also quantified a third paralogue, SLC25A24, which showed a higher  
190 abundance in spleen tissue. Notably, the spleen harbors a large pool of B-cells and reduced SLC25A24  
191 levels were previously linked to B-cell malignancies (Sandhu et al., 2013) (Figure 3E). Although these three  
192 ATP-Mg<sup>2+</sup>/P<sub>i</sub> carriers were not detected in mitochondria from heart tissue, we identified another class of

193 ATP carriers, including SLC25A4 or SLC25A31, which both showed increased abundance in heart compared  
 194 to all other measured tissues. Such differences between mitochondrial proteome compositions are easily  
 195 retrieved from our dataset, facilitating a better understanding of mitochondrial plasticity across tissues.

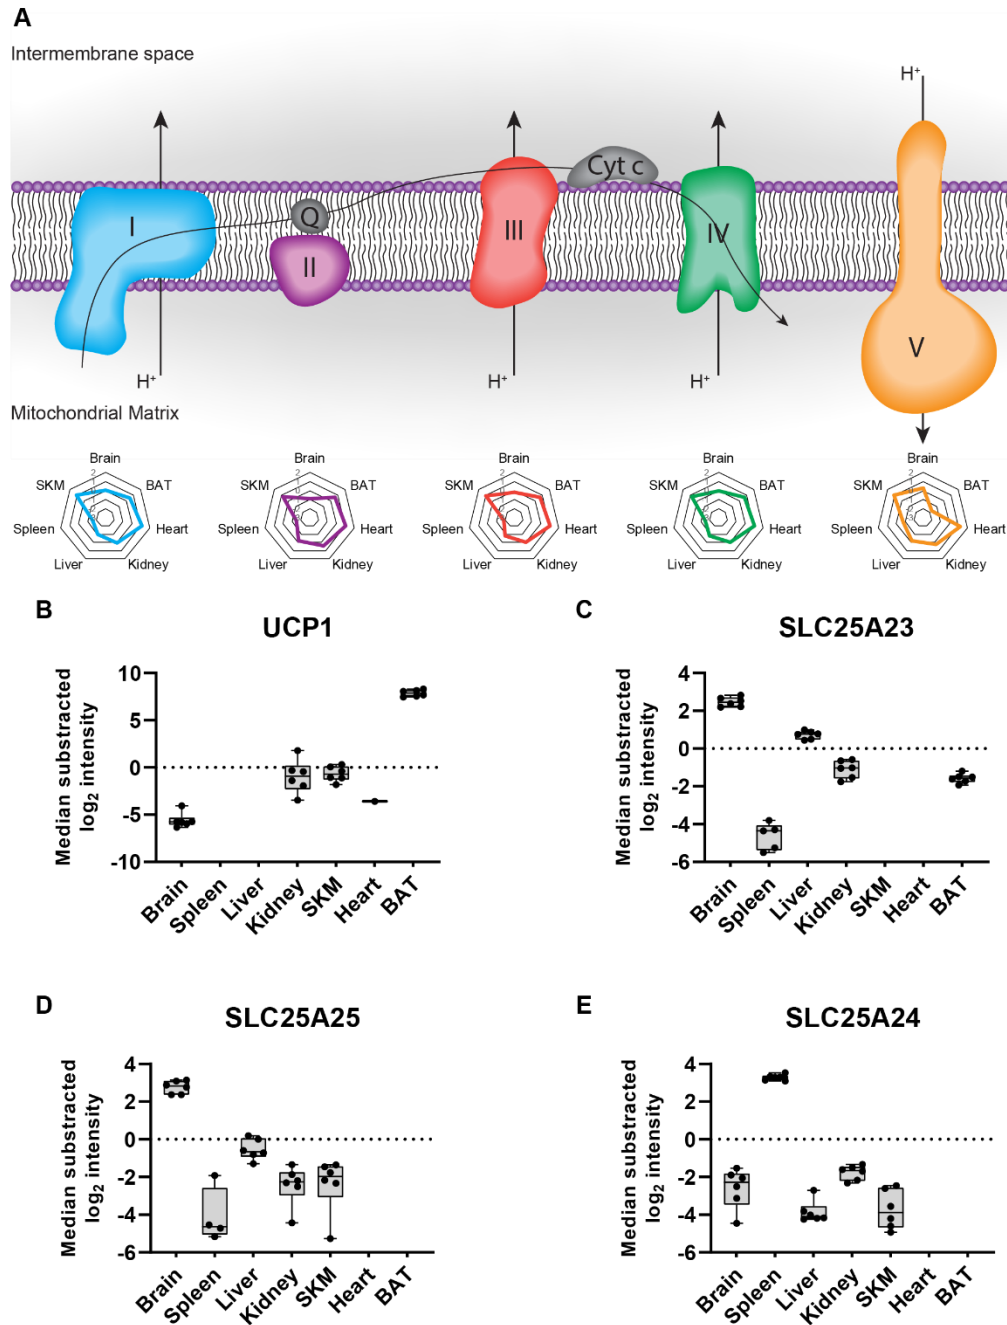

196

197 **Figure 3 Tissue-specific protein contribution of SLC25 proteins the mitochondrial proteome**

198 (A) Representation of the oxidative phosphorylation (OXPHOS) system including from left to right the electron transport chain  
199 (Complex I (blue), Complex II (violet), Complex III (red), Complex IV (green)) and ATP synthase (Complex V (yellow)). Radar plots  
200 show the relative contribution of the corresponding complex across the analyzed tissues to the overall mitochondrial  
201 composition (see methods for detailed description). (B) Normalized intensity (median of all  $\log_2$  transformed mitochondrial  
202 proteins of a sample was subtracted from all  $\log_2$  protein intensities of that sample) of the uncoupling protein 1 (UCP1), (C)  
203 SLC25A23, (D) SLC25A25, and (E) SLC25A24 across all analyzed tissues (black dots indicate individual identifications). Protein  
204 abundance differences in relation to the reference tissue (BAT in B, Brain in C and D and spleen in E) were significant (p-value  
205  $<0.0001$ ) by one-way ANOVA analysis (Figure 3 - Source Data 1). Data in this figure is based on the analysis of six replicates  
206 (n=6) for each tissue. Skeletal muscle (SKM), brown adipose tissue (BAT). See also Figure 3 – Source Data 1.

207

## 208 Tissue-specific function of mitochondria-associated proteins

209 The identification of key proteins mediating the crosstalk of mitochondria with their cellular environment  
210 is crucial to better understand their tissue-specific regulation and this concept has already attracted  
211 considerable interest in recent years (Montes de Oca Balderas, 2021). Although the characterization of  
212 local proteomes of organellar contact sites usually require special centrifugation-based isolation methods,  
213 we anticipated that a considerable fraction of mitochondria-associated proteins would also enrich along  
214 with mitochondria in our samples. We first performed an annotation term enrichment analysis of all  
215 identified proteins. While we observed significant enrichment of several mitochondria related terms in all  
216 tissues as expected, the non-mitochondrial protein pool was largely enriched for terms related to the  
217 tissue of origin (Figure 4 – supplement 1, Figure 4 - Source Data 1). For instance, terms like ‘epoxygenase  
218 P450 pathway’ in liver, ‘positive regulation of B cell activation’ in spleen or ‘positive regulation of  
219 excitatory postsynaptic potential’ in brain tissue highlight tissue-specific functions.

220 Next, we performed a network analysis to evaluate the nature and quality of co-enriched proteins, more  
221 specifically whether non-mitochondrial proteins identified in these samples are associating proteins with  
222 functional roles or biological contaminations that are likely tissue-specific and high abundant. This analysis

223 revealed several clusters of known mitochondrial complexes such as the Tim23 complex or processes like  
224 the ubiquinone biosynthetic process, whose members were robustly identified in all tissues, and several  
225 tissue-specific clusters including both mitochondrial and non-mitochondrial proteins (Figure 4). For  
226 instance, in line with terms enriched for co-sedimenting proteins in liver tissue, we identified a cluster of  
227 cytochrome P450 superfamily members exclusively in liver tissue (Figure 4). Intriguingly, CYP2E1 and  
228 CYP1A2, two specific members of this family, were previously shown to be targeted to the mitochondria  
229 (Avadhani et al., 2011; Genter et al., 2006; Robin et al., 2001), and we now find evidence of the enrichment  
230 of many more family members in this tissue. Another identified cluster consisted of G proteins, some of  
231 which were identified throughout all tissues and previously annotated as mitochondrial (e.g. GNB1, GNB2  
232 and GNG5) or shown to localize to mitochondria (GNAI2) (Beninca et al., 2014). Interestingly, like the  
233 majority of the proteins in the G protein cluster, many G protein coupled receptors (GPCR) were  
234 exclusively identified in brain tissue. A prominent member of these brain specific GPCRs is CNR1, which  
235 was reported to localize to mitochondria where it plays an important role in the regulation of memory  
236 processes through the modulation of the mitochondrial energy metabolism (Hebert-Chatelain et al.,  
237 2016). These examples highlight the value of our dataset for uncovering novel mitochondrial and  
238 mitochondria-associated proteins in an unbiased way.

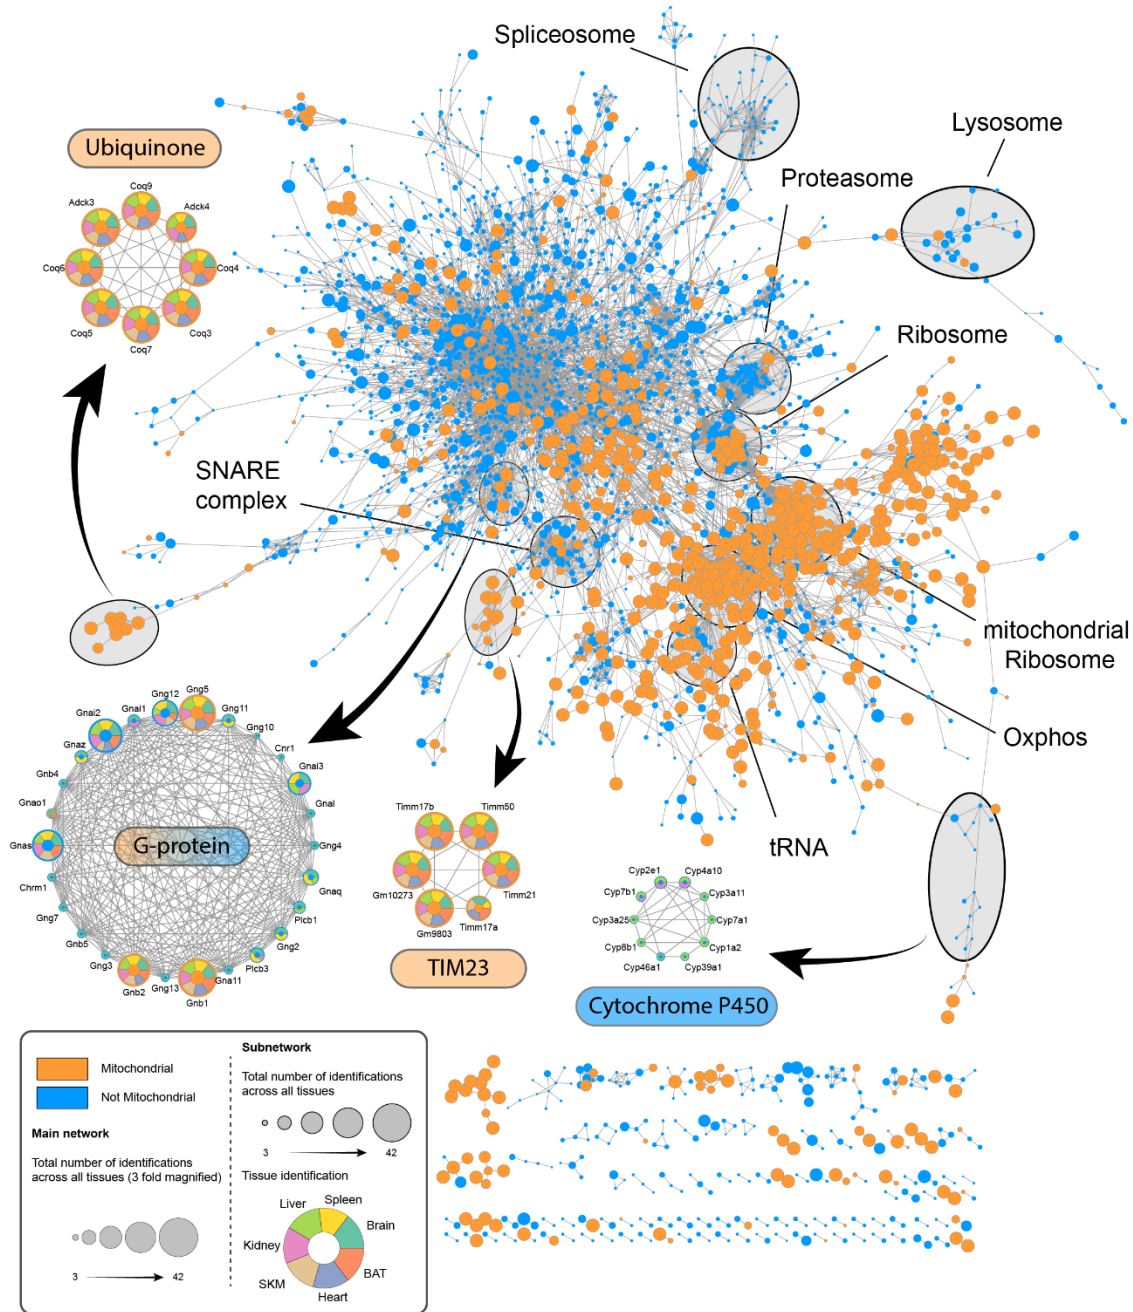

239

240 **Figure 4 Proteome of mitochondria enriched samples displays tissue-specific complexes**

241 Cytoscape network analysis of reproducibly (> 50% identification rate in at least one tissue, six replicates were analyzed (n=6))

242 identified proteins of all mitochondria enriched samples. The main network depicts mitochondrial (orange) and non-

243 non-mitochondrial (blue) proteins with at least one edge (String score >0.95). The size of individual nodes represents the number of

244 identifications ranging from 3 (small circle) to 42 (big circle). Subnetworks display mitochondrial (orange) and non-mitochondrial

245 (blue) proteins and tissues in which they were identified (dark green – brain; yellow – spleen; light green – liver; pink – kidney;  
246 ochre – SKM; blue – heart; orange – BAT). Skeletal muscle (SKM), brown adipose tissue (BAT). See also Figure 4 – Source Data 1.

247

## 248 Mitochondrial kinases and phosphatases show tissue specificity

249 Post-translational modification of proteins, specifically phosphorylation, plays a crucial role in the  
250 orchestration of mitochondrial protein function (Niemi and Pagliarini, 2021). However, almost no  
251 mitochondrial kinases with mitochondrial targeting sequences have been consistently reported and most  
252 kinases shown to associate with mitochondria have been found on or interact with the outer membrane  
253 (Kotrasova et al., 2021). Given our deep mitochondrial proteomes, we investigated relative abundances  
254 of kinases and phosphatases, which are annotated as or suggested to be mitochondrial, across mouse  
255 tissues.

256 Firstly, we observed clear differences in abundances of identified mitochondrial kinases and  
257 phosphatases, including well described matrix kinases and phosphatases, between tissues (Figure 5A). For  
258 instance, PDK1, PDK2, and PDK4 contributed preferentially to the composition of heart, SKM and BAT  
259 mitochondria, while the PDK3 was more abundant in brain, spleen, and kidney mitochondria. These tissue-  
260 related differences are in line with earlier reports and suggest a specialized function of PDK3, which may  
261 originate in its insensitivity to pyruvate inhibition (Klyuyeva et al., 2019; Sadana et al., 2018). Similarly,  
262 levels of the heterodimeric pyruvate dehydrogenase phosphatase consisting of PDP1 and PDP2 were  
263 elevated in brain, SKM, and heart compared to the remaining tissues, whereas PDP2 contributes more to  
264 the composition of liver, kidney, and BAT mitochondria. While our study confirmed previous reports on  
265 the differential expressions of these proteins in a tissue-specific manner (Huang et al., 1998; Huang et al.,  
266 2003), it also provided quantitative data to assess the magnitude of these differences. Together, our  
267 results imply a tailored regulation of kinase and phosphatase abundances across tissues to modulate the  
268 mitochondrial phosphoproteome.



269 To investigate if and how kinase and phosphatase levels translate into protein phosphorylation, we  
270 analyzed the mitochondrial phosphoproteomes of the same samples collected from all seven tissues  
271 (Figure 1A). This analysis resulted in the identification of 1263 phosphorylation sites on 626 mitochondrial  
272 proteins (Figure 5B, Figure 5 - Source Data 1). After stringent filtering of the data for more than four  
273 identifications across six biological replicates in at least one tissue and a site localization score higher than  
274 75%, we obtained a dataset of 758 phosphorylation sites on 423 mitochondrial proteins (Figure 5C, Figure  
275 5 - Source Data 1). Of these high confidence sites, 16% have previously not been reported in mouse  
276 according to the PhosphoSitePlus (PSP) database (Hornbeck et al., 2012). Strikingly, in contrast to the  
277 mitochondrial proteomes, 37% of the phosphosites identified on mitochondrial proteins were exclusive  
278 to one tissue, and only 8% were identified in all the tissues measured (Figure 5C). This might indicate that  
279 mitochondrial diversity is more strongly pronounced at the phosphorylation than the protein level.

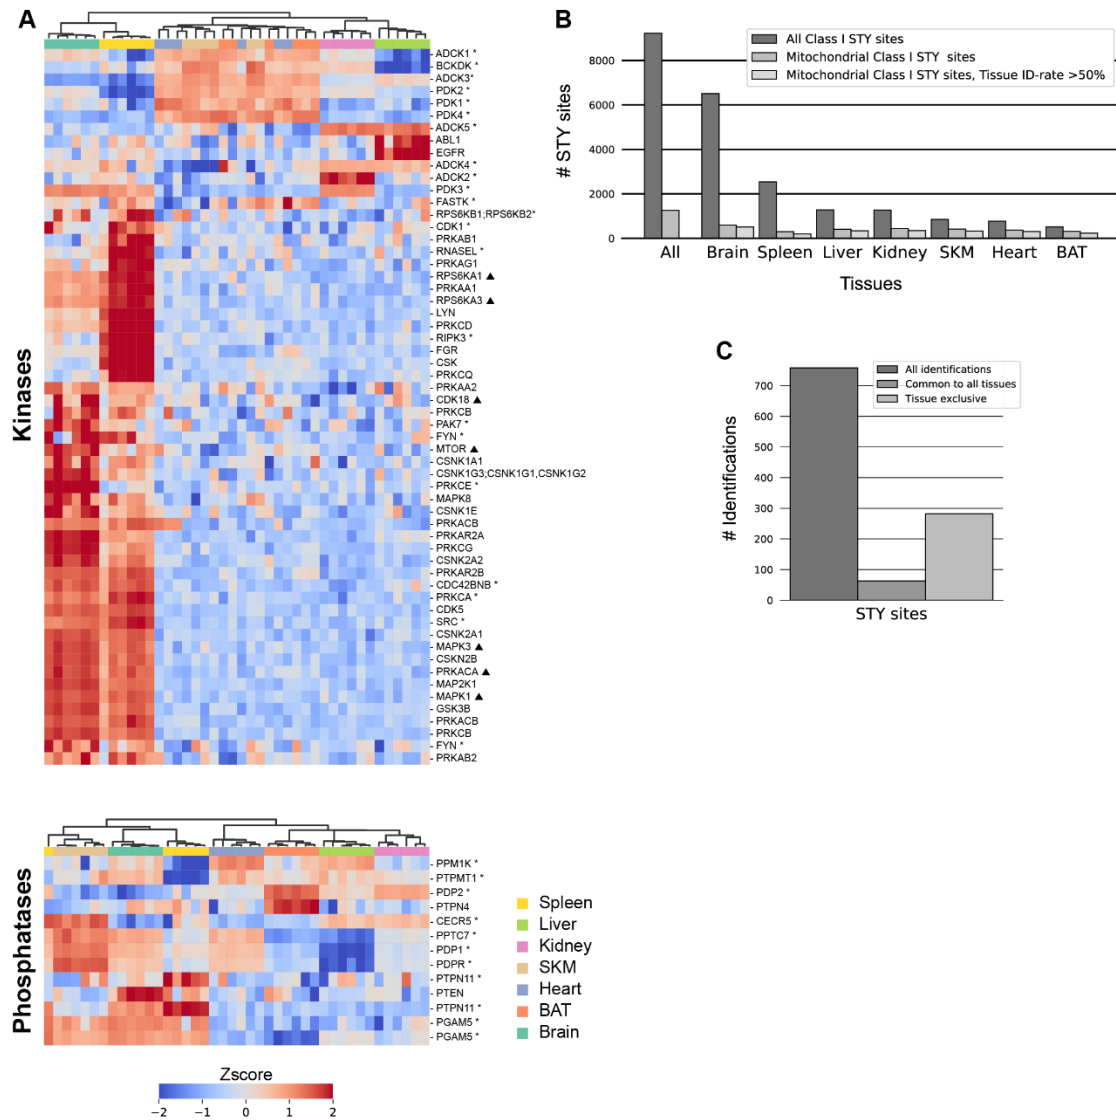

280

281 **Figure 5 Tissue specificity of mitochondrial kinases and phosphatases**

282 (A) Z-scored protein abundances for predicted (triangle), known (star) (based on MitoCarta3.0 and IMPI database), and manually  
 283 curated (Figure 5 - Source Data 1) mitochondrial kinases (top) and phosphatases (bottom) across analyzed tissues. Skeletal muscle  
 284 (SKM), brown adipose tissue (BAT). (B) STY site identification numbers. (C) Mitochondrial STY site numbers after filtering for  
 285 mitochondrial STY sites identified in at least 5 out of 6 biological replicates in one tissue. Identification numbers for all identified  
 286 STY sites (left), STY sites common to all tissues (middle), and STY sites exclusive to one tissue (right) are shown. Data in this figure  
 287 is based on the analysis of six replicates (n=6) for each tissue. Skeletal muscle (SKM), brown adipose tissue (BAT). See also Figure  
 288 5 – Source Data 1.

## 289 Mitochondrial phosphoproteomes exhibit extensive intra-mitochondrial phosphorylation

290 To understand the distribution of mitochondrial phosphoproteins across mitochondrial compartments we  
291 examined the sub-mitochondrial localization based on the curated MitoCarta3.0 annotation.  
292 Mitochondria are typically divided into four main compartments, i.e. mitochondrial outer membrane  
293 (OMM), intermembrane space (IMS), inner mitochondrial membrane (IMM) and matrix, although the  
294 complex organization of the IMM possibly may define additional compartments (Colina-Tenorio et al.,  
295 2020). In line with the high proportion of shared mitochondrial proteomes across all tissues (Figure 1C),  
296 the overall localization of proteins was not different between tissues and closely resembled the  
297 distribution of all annotated mitochondrial proteins in the database (Figure 6A). However, when  
298 performing the same analysis using the phosphorylated mitochondrial proteins, we observed a significant  
299 shift towards a localization to the OMM in all tissues (adj. p-values  $<6.4 \times 10^{-10}$ )(Figure 6A, Figure 6 –  
300 supplement 1). Surprisingly, our data also showed that depending on the tissue type, more than 60% of  
301 phosphorylated mitochondrial proteins had an intra-mitochondrial annotation - IMM, IMS or matrix  
302 localization - (Figure 6A, Figure 6 – supplement 1). Interestingly, 36-54% of OMM, but only 7-22% of intra-  
303 mitochondrial proteins were phosphorylated. Here, especially brain (10%) and spleen (7%) tissues showed  
304 low intramitochondrial phosphorylation rates.

305 This prompted us to further investigate the localization of specific kinase-substrate associations (KSA)  
306 across sub-mitochondrial localizations using NetworKin3.0 (Horn et al., 2014). Prominently, more than  
307 40% of the predicted KSA in the IMM were linked to the PKC kinase family (Figure 6B). Studies have already  
308 reported the localization of PKC kinase family members to mitochondria, as well as an increased  
309 phosphorylation of the IMM protein COX IV after PKC $\epsilon$  activation (Baines et al., 2002; Jaburek et al., 2006;  
310 Majumder et al., 2000; Ogbi and Johnson, 2006; Ping et al., 2002). Moreover, the MAPK group appeared  
311 to act on proteins localized to the OMM and matrix, while the PDHK family was specifically associated  
312 with the matrix proteins (Figure 6B). The members of the latter kinase family are known to localize to the

313 mitochondria matrix (Hitosugi et al., 2011), further supporting the validity of identified KSA. However,  
 314 molecular studies are needed to investigate such KSA, whether phosphorylation of intra-mitochondrial  
 315 proteins occurs *in situ* or outside mitochondria before being imported into mitochondria, how and which  
 316 kinases/phosphatases translocate to or into mitochondria and whether these phosphorylation events are  
 317 functionally relevant.

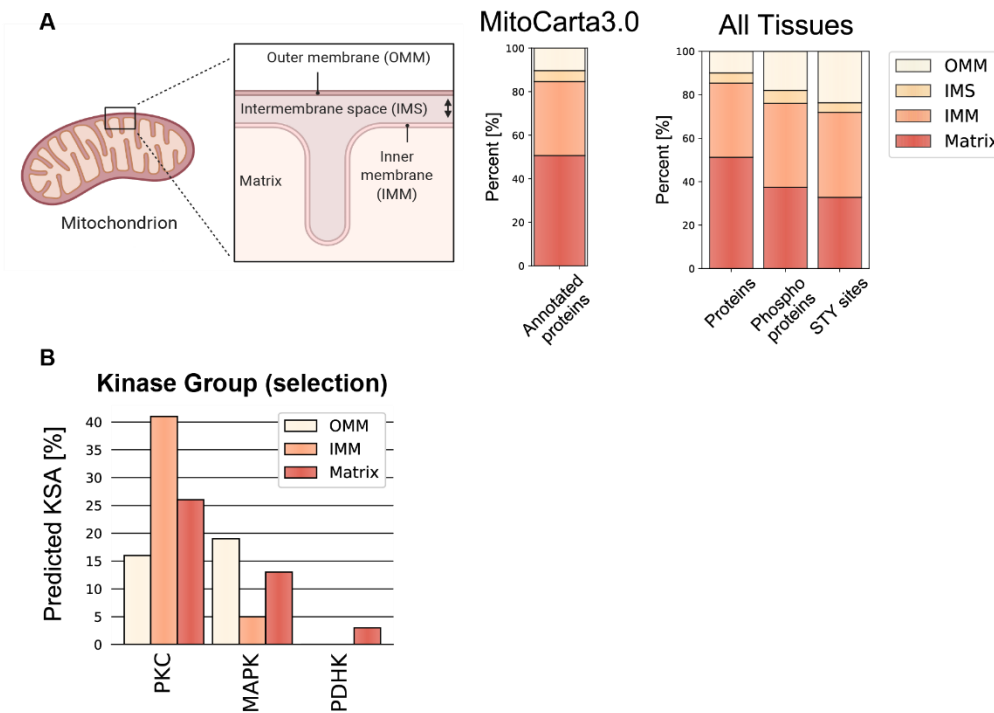

318

319 **Figure 6 Localization distribution of mitochondrial phosphoproteome diverges from mitochondrial**  
 320 **proteome**

321 (A) Simplified scheme of a mitochondrion with four different mitochondrial localizations – outer mitochondrial membrane  
 322 (OMM), intermembrane space (IMS), inner mitochondrial membrane (IMM), matrix – and the distribution of mitochondrial  
 323 proteins contained in and classified by the MitoCarta3.0 database. Bar graphs show the precentral distribution of mitochondrial  
 324 proteins (left), phosphoproteins (middle) and STY sites (right) across different mitochondrial localizations. (B) Predicted Kinase  
 325 substrate associations (KSA) by the NetworKin3.0 tool for selected kinase families. Data in this figure is based on the analysis of  
 326 six replicates for 7 different tissues. See also Figure 6 – Source Data 1.

327

## 328 Mitochondrial phosphoproteome reveals tissue-specific modulation of fusion and fission 329 events

330 The tissue-specific phosphorylation of mitochondrial proteins suggested functional differences in  
331 mitochondria and prompted us to investigate the influence of phosphorylation on mitochondrial  
332 dynamics. We focused on proteins involved in mitochondrial fusion and fission, two important  
333 counteracting events involved in organelle distribution, size balancing and maintenance of a healthy  
334 mitochondrial network (Liu et al., 2020; Silva Ramos et al., 2019). Especially proteins involved in the fission  
335 process are regulated by a range of protein modifications, including phosphorylation (Cribbs and Strack,  
336 2007; Taguchi *et al.*, 2007; van der Blik et al., 2013).

337 Throughout all tissues, MIGA1 (FAM73A) and MIGA2 (FAM73B), two homologues regulating  
338 mitochondrial fusion by functioning downstream of the mitofusins, showed different abundances (Figure  
339 6 – supplement 2). This is especially interesting since MIGA1 and MIGA2 can form hetero and  
340 homodimers, highlighting a different regulation of fusion in different tissues (Zhang et al., 2016).  
341 Moreover, we identified multiple phosphorylation site clusters on MIGA2, while none were identified on  
342 MIGA1 (Figure 6 – supplement 2). Intriguingly, similar phosphorylation clusters were identified on Miga  
343 in *Drosophila melanogaster* (Xu et al., 2020). Interestingly, two phosphorylation sites on Miga, S246 and  
344 S249, were reported to be essential for Vap33 interaction and the establishment of endoplasmic  
345 reticulum–mitochondria contact site (ERMCS), suggesting that phosphorylation on MIGA2 has similar  
346 functions in mammals (Xu *et al.*, 2020).

347 Moreover, we observed that GTPase dynamin-related protein 1 (DRP1), a crucial player initiating  
348 mitochondrial fission (Bleazard et al., 1999; Cereghetti et al., 2008), displayed higher abundance in brain  
349 compared to other tissues (Figure 7A). This observation supports the importance of mitochondrial fission  
350 in neurons, where mitochondria switch to a fragmented morphology to enter and travel through axons

351 (Lewis *et al.*, 2018). Additionally, we also found elevated levels of serine 622 phosphorylation on DRP1 in  
352 brain tissue. This site has been shown to regulate DRP1 translocation to mitochondria (Cereghetti *et al.*,  
353 2008; Cribbs and Strack, 2007; Taguchi *et al.*, 2007), indicating that it is actively localized to mitochondria,  
354 likely to regulate constant fission events in the brain tissue (Figure 7B).

355 In mammals, four DRP1 receptor proteins, that are all integral membrane proteins of the OMM, have  
356 been reported: mitochondrial fission protein 1 (FIS1), mitochondrial fission factor (MFF), and  
357 mitochondrial dynamics protein MiD49 (MIEF1) and MiD51 (MIEF2) (Loson *et al.*, 2013). MFF and FIS1,  
358 the fission promoting receptors, were robustly quantified in all tissues and displayed higher abundances  
359 in brain and spleen compared to other tissues (Figure 7A). However, MIEF1/2, which counteract DRP1-  
360 mediated fission (Dikov and Reichert, 2011; Liu *et al.*, 2013), were generally too low to be robustly  
361 quantified in the measured tissues. Additionally, we detected higher levels of MFF phosphorylation at the  
362 serine 129 and 146 residues in brain tissue compared to all other tissues in which they were detected  
363 (Figure 7C and 7D). Both sites are essential for the recruitment of DRP1 and initiation of fission  
364 (Ducommun *et al.*, 2015; Lewis *et al.*, 2018; Toyama *et al.*, 2016).

365 Elevated DRP1 levels have been shown to increase ROS levels (Watanabe *et al.*, 2014). Intriguingly, we  
366 identified oxidation resistance 1 (OXR1), exclusively in the mitochondria of brain tissue, where it plays an  
367 important role in the protection of neuronal cells from oxidative stress (Volkert and Crowley, 2020). This  
368 likely indicates a protective function of OXR1 in brain tissue as a response to the prevalent fragmented  
369 organellar morphology induced by DRP1. In addition, we found OXR1 to be hyperphosphorylated and  
370 three out of 12 high confidence sites were novel (Figure 7E). Tissue specificity and the lack of functional  
371 annotation of phosphorylation sites that are identified in our study make OXR1 an exciting candidate to  
372 be investigated in the future.

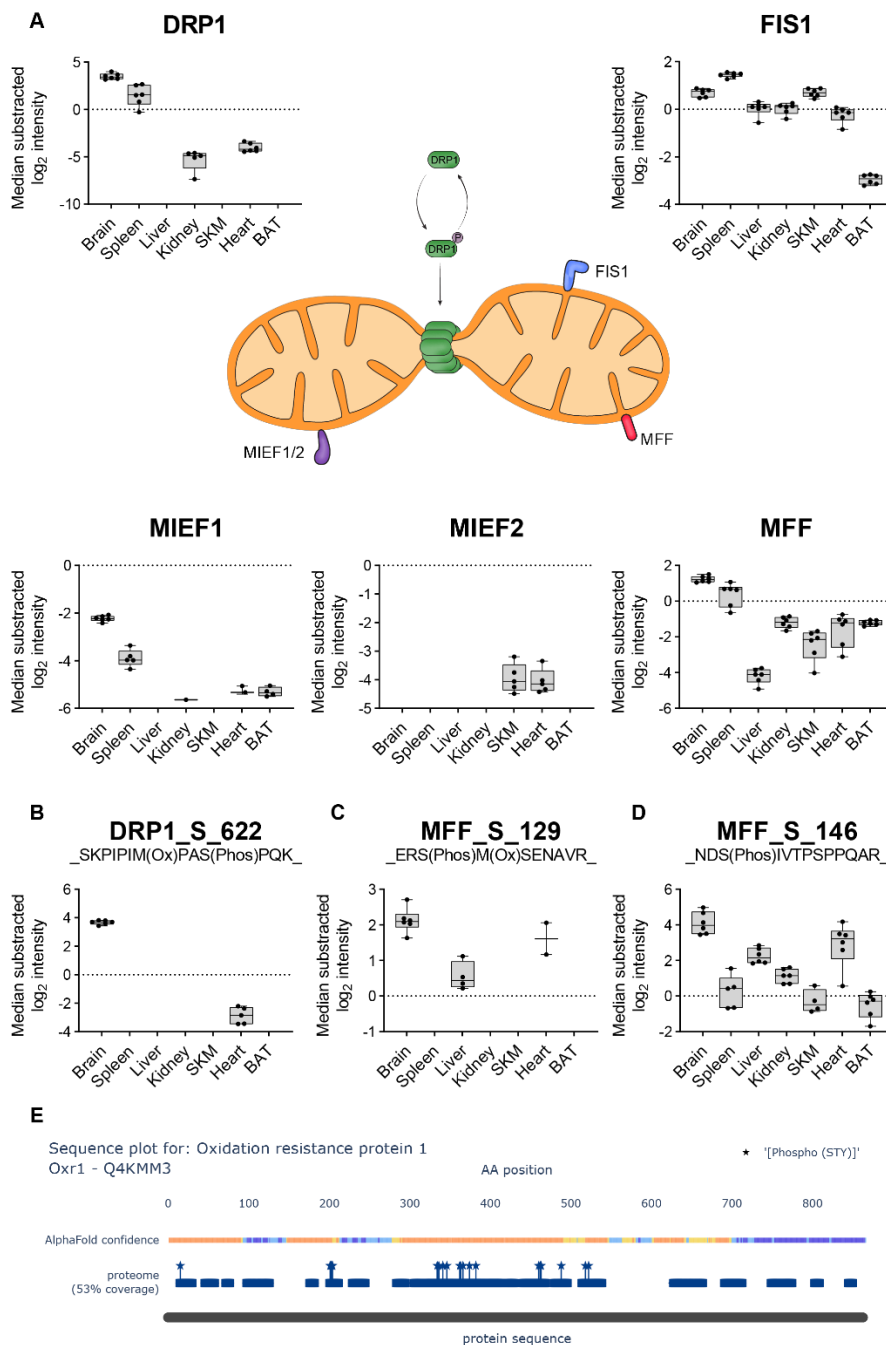

373

374 **Figure 7 Phosphoproteome reveals tissue-specific functionality for mitochondrial fission**

375 (A) Scheme displays the reversible phosphorylation and the connected localization change to mitochondria of DRP1 (green).  
 376 Normalized intensities (median of all  $\log_2$  transformed mitochondrial proteins of a sample was subtracted from all  $\log_2$  protein  
 377 intensities of that sample) of DRP1 across all analyzed tissues (black dots indicate individual identifications) are displayed in the  
 378 upper left. Mitochondrial DRP1 receptors – FIS1 (blue), MIEF1/2 (violet), MFF (red) – and corresponding box plots are shown next

379 to their receptors. (B) Normalized intensities (median of all  $\log_2$  transformed mitochondrial phosphopeptide of a sample was  
380 subtracted from all  $\log_2$  peptide intensities of that sample) of the phosphopeptide showing S622 phosphorylation on DRP1 (black  
381 dots indicate individual identifications). (C) Same as (B) showing S129 phosphorylation on MFF. (D) Same as (B) showing S146  
382 phosphorylation on MFF. Significance of protein abundance differences in relation to the reference tissue (brain for DRP1 panel,  
383 brain and spleen in FIS1 and MFF panel) were estimated (p-values <0.001, except for SKM in FIS1 panel) by one-way ANOVA  
384 analysis (Figure 7 - Source Data 1). Significance of phosphosites abundance differences in (B) and (C, only brain and liver) were  
385 estimated by a two-side t-test (Figure 7 - Source Data 1). Significance of MFF\_S\_146 abundance differences in relation to the  
386 reference tissue (brain) were estimated (p-value<0.05) by one-way ANOVA analysis (Figure 7 - Source Data 1). Data in this figure  
387 is based on the analysis of six replicates (n=6). Skeletal muscle (SKM), brown adipose tissue (BAT). See also Figure 7 – Source  
388 Data 1.

389

## 390 **Web application makes Mouse Mitochondria Atlas data readily accessible**

391 As indicated by the above examples, this study presents a rich resource to explore the mitochondrial  
392 proteomes and phosphoproteomes across mouse tissues. Preceding examples show the potential of this  
393 resource for investigation of tissue-specific mitochondrial regulations on the proteome and  
394 phosphoproteome level, ultimately permitting the generation and analysis of new hypotheses. However,  
395 utilization of such resources largely depends on the ease of data access for exploration.

396 To this end, we created a web application [mitophos.de](http://mitophos.de) offering the end user an interface to easily explore  
397 datasets, including MitoCarta3.0 networks, abundance comparisons across tissues and sequence analysis  
398 (Figure 8A). As an example, Figure 8 illustrates the MICOS complex, which has a central role in  
399 mitochondria (Khosravi and Harner, 2020). In the network view one can see (I) members of the complex  
400 as well as the phosphorylation sites identified on these proteins and (II) in which tissues and how  
401 reproducibly they are identified in our dataset (Figure 8B). Moreover, the user can inspect individual  
402 abundance distributions of all identified proteins/STY sites across all measured tissues. For instance,  
403 MINOS1, a core component of the MICOS complex (Bohnert et al., 2015), displayed high abundance in



404 mitochondria isolated from heart, SKM and BAT tissues (Figure 8C). Moreover, in the sequence view the  
405 AlphaMap tool (Voytik et al., 2021) is integrated to map all identified peptides, including phosphorylated  
406 peptides, onto their respective protein sequence along with structural information such as topological  
407 domains and transmembrane regions (Figure 8D) and to visualize phosphorylation sites in their 3D  
408 structures (unpublished data) as predicted by AlphaFold (Jumper et al., 2021).

409 Together, this data-rich and comprehensive tool is an entry point to investigate the herein presented  
410 resource and will assist in future efforts to functionally characterize mitochondrial proteins and their  
411 respective phosphorylation sites.

412

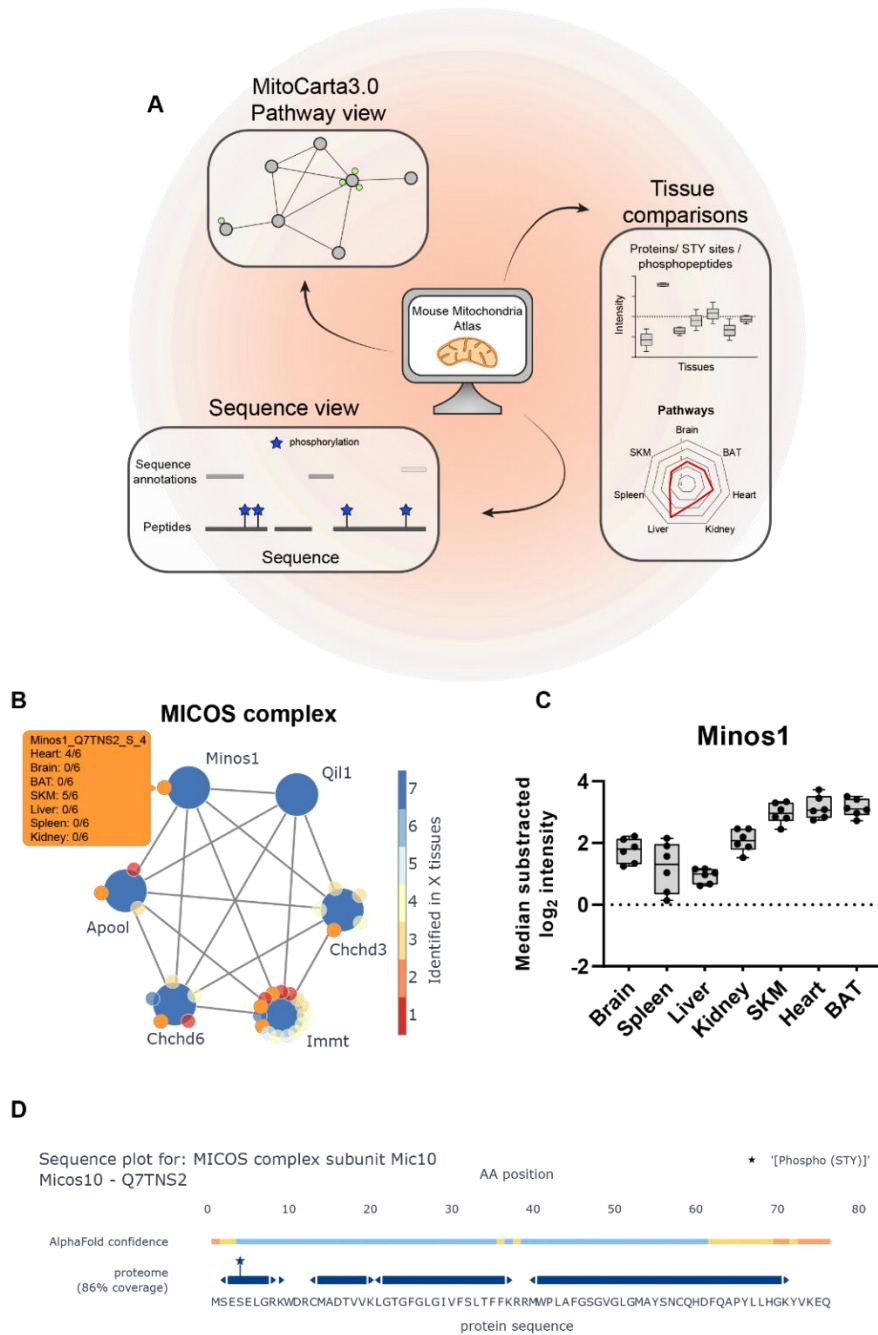

413

414 **Figure 8 Web application readily enables easy data access**

415 (A) Scheme of Mouse Mitochondria Atlas application features ([mitophos.de](https://mitophos.de)). (B) MICOS complex view based on MitoCarta3.0  
 416 annotation. Large and small nodes represent proteins and class I STY sites, respectively. Edges represent on String interaction  
 417 scores >0.4 and color of nodes indicate the number of tissues in which proteins/STY sites were identified. (C) Normalized  
 418 intensities (median of all  $\log_2$  transformed mitochondrial proteins of a sample was subtracted from all  $\log_2$  protein intensities of

419 that sample) for Micos1 across all analyzed tissues (black dots indicate individual identifications, box and error bar). (D) Sequence  
420 plot of Micos1 shows structural information (based on UniProt annotations) and protein coverage based on identified peptides.  
421 All identified STY sites are marked with a star. Data in this figure is based on the analysis of six replicates (n=6). Skeletal muscle  
422 (SKM), brown adipose tissue (BAT).

## 423 Discussion

424 Here we present a tissue-specific atlas of mouse mitochondrial proteomes and phosphoproteomes, an in-  
425 depth resource towards a better understanding of the composition and function of this vital organelle in  
426 a tissue-specific manner. Previous MS-based studies combining mitochondrial phosphoproteome and  
427 proteome measurements typically focused on a single or few tissues and were generally shallower than  
428 our study. In addition, differences in study designs such as utilization of various organisms or  
429 mitochondria/phosphopeptide enrichment protocols, analysis pipelines, and mitochondrial protein  
430 annotation databases, complicate the integration of such datasets to understand tissue specificity. We  
431 now globally and precisely quantified different protein expression and phosphorylation patterns at  
432 subcellular level across seven mouse tissues, providing a detailed view on mitochondrial diversity. The  
433 breadth and depth of coverage achieved by the integration of tissue-specific mitochondrial proteomes  
434 and phosphoproteomes provide unbiased insights into the mitochondrial composition and function. This  
435 allows the generation and assessment of novel hypotheses related to mitochondrial biology, which cannot  
436 be generated with focused studies alone. Integrated mitochondrial proteomes and phosphoproteomes  
437 that are diverse between tissues can readily be explored at [mitophos.de](http://mitophos.de).

438 Our data revealed that the functional diversity of mitochondria is defined by protein abundance rather  
439 than compositional differences since more than half of the mitochondrial proteome was shared by all  
440 analyzed tissues and 90% by at least two tissues. For instance, the electron transport chain is an integral  
441 part of the mitochondrial composition and its components are found across all tissues, however, their  
442 abundance shows substantial differences to meet tissue-specific energy demands. Thus, dysregulation of  
443 individual proteins can strongly affect mitochondria in one tissue, leading to severe diseases, while  
444 mitochondria in a different tissue remain largely unaffected. Moreover, we found that 9% of the proteome  
445 displays tissue specificity, further contributing to our understanding of tissue-specific effects of

446 mitochondrial protein dysregulation (Russell et al., 2020). This is an important concept, which can now be  
447 studied in an unbiased manner using our resource data, providing opportunities for development of  
448 targeted treatments for mitochondrial diseases. For instance, members of the SLC25 family are linked to  
449 metabolic diseases in distinct tissues (Palmieri and Monne, 2016) and various cancers (Rochette et al.,  
450 2020). However, biological functions of a large repertoire of mitochondrial SLCs are still unknown. For  
451 example, inactivation of SLC25A25 was assessed in mouse skeletal muscle tissue where it caused a  
452 reduced metabolic efficiency (Anunciado-Koza et al., 2011). Given its high abundance in mitochondria of  
453 brain tissue and in glioma cells (Traba et al., 2012), it will also be interesting to investigate its role in this  
454 tissue, particularly whether SLC25A25 deficiency influences neuronal fitness.

455 Mitochondria are essential cellular entities that are involved in a wide variety of cellular processes  
456 (McBride et al., 2006) through dynamic interaction and constant communication with other organelles  
457 such as the (ER), nucleus and peroxisomes via membrane contact sites (Desai et al., 2020; Perrone et al.,  
458 2020; Shai et al., 2018) or protein complexes, such as the ribosome (Lashkevich and Dmitriev, 2021). We  
459 suggest that non-mitochondrial proteins identified in the samples might present signatures that could  
460 convey important biological information regarding mitochondria-associated structures. Given the high  
461 level of mitochondrial enrichment combined with highly reproducible LC-MS/MS measurements, such  
462 protein signatures are unlikely to be solely based on unspecific enrichment of abundant proteins. For  
463 example, the proteasome is robustly identified in most of the mitochondria enriched samples, which is in  
464 line with its involvement in the degradation of misfolded mitochondrial proteins (Basch et al., 2020;  
465 Kodron et al., 2021). We also prominently observed that several members of the cytochrome P450  
466 superfamily are enriched in liver mitochondria, demonstrating the versatile interaction of mitochondria  
467 with their cellular environment. Furthermore, our data identified non-mitochondrial ribosomal proteins  
468 in all tissues, which could be explained by the local translation of nuclear-encoded mitochondrial mRNAs  
469 (Lashkevich and Dmitriev, 2021). It was recently shown that RNA-bearing late endosomes associate with

470 mitochondria and ribosomes forming hotspots of local protein synthesis in axons (Cioni et al., 2019) and  
471 that mitochondria fuel such local translation in neurons, enabling synaptic plasticity (Rangaraju et al.,  
472 2019).

473 There is mounting evidence that phosphorylation of mitochondrial proteins fulfills important functions to  
474 maintain cellular health as exemplified by the fission process in this study. Deregulation of mitochondrial  
475 protein phosphorylation can lead to diseases such as cancer, diabetes, heart and neurological disorders.

476 It was recently reported that 91% of mitochondrial proteins on MitoCarta3.0 have at least one  
477 phosphorylation site reported on the PSP database (Niemi and Pagliarini, 2021). However, this analysis  
478 also includes proteins that do not always localize to mitochondria (Ben-Menachem et al., 2011) and  
479 phosphorylation sites that can specifically be captured upon perturbations and stimuli. Our study revealed

480 that around half of the mitochondria-localized proteins were phosphorylated in tissues at steady state -  
481 39% in brain, 15% in spleen, 29% in liver, 28% in kidney, 32% in SKM, 31% in heart and 22% in BAT. This  
482 suggests that the mitochondrial proteome and phosphoproteome compositions are dynamically

483 modulated in response to environmental changes. Furthermore, we identified over 60 kinases and 10  
484 phosphatases that either are localized to mitochondria or associate with mitochondria, providing a global  
485 view on important modulators of mitochondrial protein phosphorylation. Mapping tissue-specific

486 mitochondrial kinases and phosphatases is an important step towards understanding their role in the  
487 regulation of the mitochondrial phosphoproteome in different tissues and hence developing therapeutics  
488 for mitochondrial diseases. For example, a mitochondrial phosphatase, phosphoglycerate mutase family

489 member 5 (PGAM5), has recently emerged as an important regulator of mitochondrial homeostasis.  
490 Deletion of PGAM5 has been shown to result in Parkinson's-like movement disorder in mice (Lu et al.,  
491 2014) and T cell dysfunction in primary cells (Panda et al., 2016). While its diverse roles largely remain to

492 be uncovered (Liang et al., 2021), a novel PGAM5 inhibitor was recently suggested as a potential  
493 therapeutic for brain ischemic stroke (Gao et al., 2021). We observed that PGAM5 displays elevated levels

494 in the mitochondria isolated from brain, SKM and spleen, possibly explaining the tissue-specific  
495 phenotypes induced by its absence and where in the body molecules targeting its phosphatase activity  
496 would exert their effects.

497 The data in this study will contribute to our understanding of the tissue-specific composition and function  
498 of mitochondria and serve as a gateway for investigation of specific questions related to mitochondrial  
499 biology. Future biochemical and more focused investigations are needed to validate our findings and test  
500 the hypotheses arising from our study. For instance, it is pivotal to experimentally validate kinase-  
501 substrate associations of previously unknown phosphorylations on mitochondrial proteins and their  
502 functional implications in the cell. Additionally, the impact of those phosphorylations on the localization  
503 of target proteins and, more specifically, the question of whether mitochondrial proteins are  
504 phosphorylated before or after entering the mitochondria remain to be investigated. Accessibility, for  
505 instance, of previously undescribed phosphorylation sites on mitochondrial proteins can be assessed using  
506 advanced structural tools (Jumper *et al.*, 2021) to determine if they are likely targeted by a mitochondrial  
507 kinase or a cytoplasmic kinase before being imported (Schober *et al.*, 2021). Moreover, future  
508 developments towards better enrichment strategies for the isolation of mitochondria from different  
509 tissues and advances in the MS technology will aid to further improve the depth and quality of the  
510 mitochondrial proteomes and phosphoproteome.

## 511 Materials and Methods

### 512 Experimental model and subject details

513 Six C57BL/6N mice (3male, 3 female) were housed in a 12-hours light/dark cycle in standard ventilated  
514 cages under specific-pathogen-free conditions with constant temperature (21°C) and humidity (50 - 60%)  
515 and fed ad libitum with a standard mouse diet. At the age of 18-21 weeks mice were sacrificed by cervical  
516 dislocation. The study was approved by the by the Landesamt für Natur, Umwelt und Verbraucherschutz  
517 Nordrhein–Westfalen, Germany, and performed in accordance with European law.

### 518 Tissue preparation and isolation of ultra-pure mitochondria

519 Mice were sacrificed by cervical dislocation and the 7 tissues - heart, skeletal muscle (SKM), brown adipose  
520 tissue (BAT), spleen, kidney, liver, and brain – were rapidly removed. Heart, spleen, and kidney, tissues  
521 were homogenized in mitochondrial isolation buffer containing 320 mM sucrose, 1 mM EDTA, and 10 mM  
522 Tris-HCl, pH 7.4, supplemented with EDTA-free complete protease inhibitor cocktail and PhosSTOP tablets  
523 (Roche). For isolation of mitochondria from BAT, liver, and brain the mitochondrial isolation buffer was  
524 additionally supplemented with 0.2% bovine serum albumin (Sigma-Aldrich). Subsequently, crude  
525 mitochondria were isolated from the homogenates by two rounds of differential centrifugation (see  
526 Figure 1a). Isolation of crude mitochondria from SKM was performed as previously described (Frezza et  
527 al., 2007)). Crude mitochondrial pellets from all tissues were further purified on a Percoll density gradient  
528 as described recently (Kuhl *et al.*, 2017). Briefly, mitochondrial pellets were washed once in 1xM buffer  
529 (220 mM mannitol, 70mM sucrose, 5mM HEPES pH 7.4, 1 mM EGTA pH 7.4; pH was adjusted with  
530 potassium hydroxide; supplemented with EDTA-free complete protease inhibitor cocktail and PhosSTOP  
531 tablets (Roche)) and subsequently purified on a Percoll (GE healthcare) density gradient of 12%:19%:40%  
532 via centrifugation in a SW41 rotor at 42, 000 g at 4°C for 30 min in a Beckman Coulter Optima L- 100 XP  
533 ultracentrifuge using 14 mm × 89 mm Ultra-Clear Centrifuge Tubes (Beckman Instruments Inc.). Ultra-



534 pure mitochondria were harvested at the interphase between 19% and 40% and washed three times with  
535 1xM buffer. Dry mitochondrial pellets were snap-frozen in liquid nitrogen and stored at -80°C until further  
536 use.

### 537 Mitochondrial (phospho)proteome sample preparation

538 Frozen ultra-pure mitochondria pellets were resuspended in lysis buffer (4%SDC, 100mM Tris/HCl, pH8.5),  
539 boiled for 5 min at 95°C and sonicated in 30 s intervals for 15 min (Bioruptor). Protein concentration was  
540 estimated via Tryptophan assay (Kulak et al., 2014) and was adjusted with lysis buffer to a total volume of  
541 270 µl containing 400 µg of protein for brain, SKM, liver, heart, kidney, and 140 µg of protein for BAT  
542 samples. Proteins were reduced and alkylated by adding 30 µl of 10x reduction/alkylation solution (100  
543 mM Tris (2-carboxyethyl)phosphine hydrochloride (TCEP) and 400 mM 2-chloroacetamide (CAA), followed  
544 by 5min incubation at 45°C. Subsequently, 1:100 Trypsin and LysC were added for overnight protein  
545 digestion at 37°C. For proteome analysis 10 µl (brain, SKM, liver, heart, kidney) and 20 µl (BAT, spleen)  
546 aliquots were taken and loaded on SDB-RPS StageTips. Peptides were washed with 200µl wash buffer  
547 (0.2% TFA/2% ACN (vol/vol)) and then eluted with SDB-RPS elution buffer (1.25% NH<sub>4</sub>OH, 80% ACN  
548 (vol/vol)) and dried in a SpeedVac. Dried peptides were resuspended in A\* buffer (2% ACN/0.1% TFA).

549 The remaining samples were processed following the EasyPhos protocol for phosphopeptide enrichment  
550 (Humphrey *et al.*, 2018). In brief, samples were first mixed with isopropanol and EP buffer (48% TFA, 8  
551 mM KH<sub>2</sub>PO<sub>4</sub>), followed by phosphopeptide enrichment with 5mg TiO<sub>2</sub> beads per sample (GL Sciences). For  
552 this, samples were mixed with TiO<sub>2</sub> beads in loading buffer (6% TFA/80% ACN (vol/vol)) at a concentration  
553 of 1 mg/µl and incubated for 5 min at 40°C by shaking at 1200rpm. Subsequently beads were washed four  
554 times with 1 ml of wash buffer (5% TFA,60% isopropanol (vol/vol)) and phosphopeptides were eluted from  
555 beads using 60 µl of elution buffer (40% ACN, 5% NH<sub>4</sub>OH) and concentrated in a SpeedVac for 30 min at  
556 45°C. Samples were immediately diluted with 100 µl of SDBRPS loading buffer (99% isopropanol, 1% TFA

557 (vol/vol)) and loaded on SDB-RPS StageTips. Thereafter, phosphopeptides were washed and eluted as  
558 described above and resuspended in 6  $\mu$ l A\*.

## 559 LC-MS/MS

560 For all measurements peptides were loaded onto a 50cm, in-house packed, reversed-phase column (75 $\mu$ m  
561 inner diameter, 1. diameter, ReproSil-Pur C18-AQ 1.9  $\mu$ m resin [Dr. Maisch GmbH]) and separated with  
562 and binary buffer system consisting of buffer A (0.1% formic acid (FA)) and buffer B (0.1% FA in 80% ACN).  
563 The column temperature was controlled by a homemade column oven and maintained at 60°C. For  
564 nanoflow liquid chromatography an EASY-nLC 1200 system (Thermo Fisher Scientific), directly coupled  
565 online with a Q Exactive HF-X (Thermo Fisher Scientific) via a nano-electrospray source, was operated at  
566 a flow rate of 300 nl/min and 350 nl/min for mitochondrial proteome and phosphoproteome  
567 measurements, respectively.

568 For mitochondrial proteome measurements 500 $\mu$ g of peptides were loaded and separated using a  
569 gradient starting at 5% buffer B, increasing to 30% buffer B in 80 min, 60% buffer B in 4 min and 95%  
570 buffer B in 4 min. The MS was operated in DDA mode (Top12) with a full scan range of 300-1650 m/z and  
571 a MS1 and MS2 resolution of 60,000 and 15,000, respectively. The automatic gain control (AGC) was set  
572 to 3e6 and 1e5 for MS1 and MS2, while the maximum injection time was set to 20 ms and 60 ms,  
573 respectively. Precursor ion selection width was kept at 1.4 m/z and fragmentation was achieved by higher-  
574 energy collisional dissociation (HCD) (NCE 27%). Dynamic exclusion was enabled and set to 20 s.

575 For mitochondrial phosphoproteome measurements, 5  $\mu$ l as loaded and separated using a gradient  
576 starting at 3% buffer B, increasing to 19% buffer B in 40 min, 41% buffer B in 20 min and 90% buffer B in  
577 5 min. The MS was operated in DDA mode (Top10) with a full scan range of 300-1600 and a MS1 and MS2  
578 resolution of 60,000 and 15,000, respectively. The automatic gain control (AGC) was set to 3e6 and 1e5  
579 for MS1 and MS2, while the maximum injection time was set to 120 ms and 60 ms, respectively. Precursor

580 ion selection width was kept at 1.6 m/z and fragmentation was achieved by higher-energy collisional  
581 dissociation (HCD) (NCE 27%). Dynamic exclusion was enabled and set to 30 s.

## 582 Raw data analysis

583 DDA raw data were analyzed with MaxQuant (1.6.14.0) against the mouse fasta file (downloaded 19.  
584 October 2020) using default settings. PSM and protein dales discovery rate were controlled at 1% FDR.  
585 The match between runs (MBR) functionality was enabled and set in a way that only biological replicates  
586 belonging to the same tissue type were allowed to match each other. This eliminates the possibility of  
587 potentially false MBR identification transfer between tissues. Carbamidomethyl (C) was selected as fixed  
588 modification and Acetyl (Protein N-term) and oxidation (M) were defined as variable modifications. For  
589 mitochondrial phosphoproteome analysis, STY site phosphorylation was additionally selected as variable  
590 modification.

## 591 Bioinformatics analysis

592 Data analysis was performed using the python programing language using python (3.8.12) and the  
593 following packages: alphamap, matplotlib (3.5.0), mygene (3.2.2), numpy (1.19.2), pandas (1.1.3),  
594 pyteomics (4.3.3), requests (2.26.0), scipy (1.7.2), seaborn (0.11.2), sklearn (0.0), upsetplot (0.6.0). All  
595 notebooks used for data analysis are available at GitHub (<https://github.com/MannLabs>). Identified  
596 proteins were filtered for at least 3 valid values in at least one tissue. Similarly, phosphorylation sites were  
597 filtered for at least 5 valid values in at least one tissue and a localization probability >75%. The UniProt  
598 API was used to map 'ACC+ID' protein group identifiers provided by the MQ analysis to 'ENSEMBL\_ID',  
599 'P\_ENTREZGENEID' and 'STRING\_ID' for further analysis. 'ENSEMBL\_ID' and 'P\_ENTREZGENEID' identifier  
600 were used for mitochondrial protein annotation based on the IMPI (IMPI\_2020\_Q3, downloaded 27.  
601 October 2020) and MitoCarta3.0 (downloaded 1. January 2021) databases, respectively. Network analysis  
602 and visualization were performed with the StringApp (1.6.0) in Cytoscape (3.8.2). Kinase annotations are

603 based on manual annotations (Figure 6 - Source Data 1) and 'pkinfam' (downloaded 9. April 2021).  
604 Networkin3.0 was used for kinase substrate association (KSA) predictions, while the Networkin score was  
605 set to 1. Gene Ontology (GO) annotations for the GOBP term enrichment analysis were retrieved from  
606 UniProt (accessed 8. March 2021). Enrichment analysis was performed in Perseus (1.6.7.0) against the set  
607 of identified proteins in the corresponding tissue and the results were filtered for an intersection size >10.  
608 Missing values were only imputed for PCA and heatmap analysis. For this, a Gaussian normal distribution  
609 with a width of 0.3 relative to the standard deviation of measured values and a downshift of 1.8 standard  
610 deviations were used. For data normalization, intensity values were  $\log_2$  transformed and then filtered for  
611 known and predicted mitochondrial proteins. The median value of these mitochondrial proteins was  
612 subtracted from all  $\log_2$  transformed values. Significance testing for individual proteins and  
613 phosphopeptides as shown in Figure 3 and Figure 7 was performed with the ordinary one-way ANOVA  
614 method or by two-sided t-tests in GraphPad Prism (9.3.1) (Figure 3 - Source Data 1, Figure 7 - Source Data  
615 1). Significance testing for differences in mitochondrial protein, phosphoprotein and phosphosite  
616 localization was performed in RStudio (1.3.1093) (Figure 6 - Source Data 1). OMM proportions were used  
617 for fitting a beta-regression model using the betareg R package with default settings (Cribari-Neto and  
618 Zeileis, 2010; Grun et al., 2012). P-values were estimated with the lrtest function of the lrttest package  
619 (Zeileis and Hothorn, 2015) and p-values were adjusted with the "fdr" method of the p.adjust function of  
620 the stats base package (Benjamini and Hochberg, 1995)

## 621 Website tool

622 The website tool is structured into four sections. The first three 'Pathway view', 'Sequence view', and  
623 'Tissue comparison' are for displaying data, while the fourth section provides explanations for each  
624 individual section. In the 'Pathway view' and 'Tissue comparison', proteome and phosphoproteome data  
625 filtered for at least three and 5 identifications in at least one tissue, respectively. Intensity values were  
626 normalized as described above and used for data representation in the 'Tissue comparison' tab or z-scored

627 across tissues and used for the 'Pathway view tab'. Here, median z-score values of the six biological  
628 replicates per tissue are displayed in the data table. The polar plot represents the median z-score of all  
629 pathway/complex members of a given tissue. Network/complex annotations were retrieved from  
630 MitoCarta3.0 and protein interactions are based on STRING interaction scores. These STRING interaction  
631 scores were retrieved from STRING (17. November 2021) using the 'STRING\_ID' and the STRING API. For  
632 the 'Sequence view', the 'evidence.txt' of the MaxQuant output files was directly used as input to  
633 annotated sequences.

634 The python programming language was used for data processing and visualization for the Dashboard. The  
635 following libraries were used for data processing: numpy (1.19.2), pandas (1.19.2), re, sys, os, and  
636 pyteomics (4.3.3). Several libraries from the HoloViz family of tools were used for data visualization and  
637 creation of the dashboard, including panel (1.14.6), holoviews (1.14.6), bokeh (2.2.2), plotly (4.12.0), and  
638 param (1.10.0). Network visualization was achieved with the NetworkX package (Hagberg et al., 2008).  
639 The Alphamap tool (Voytik *et al.*, 2021) was integrated to display linear protein sequence annotations as  
640 well as to visualize 3D protein structures.

641

## 642 Resource availability

### 643 Data and code availability

644 Datasets generated in this study have been deposited at ProteomeXchange and are publicly available as  
645 of the date of publication. The accession number is listed in the key resource table. (Identifier:  
646 PXD030062).

647 All original code has been deposited on GitHub (<https://github.com/MannLabs>) and is available as of the  
648 date of publication.

649 Any additional information required to reanalyze the data reported in this paper is available from the lead  
650 contact upon request.

651

## 652 Acknowledgments

653 This work was supported by grants to N.G.L from the Swedish Research Council (2015-00418), Swedish  
654 Cancer Foundation (2021.1409), the Knut and Alice Wallenberg foundation, European Research Council  
655 (ERC Advanced Grant 2016-741366), grants from the Swedish state under the agreement between the  
656 Swedish government and the county councils (SLL2018.0471). L.S.K was supported by an EMBO long-term  
657 fellowship (ALTF 570-2019). I.K. was supported by the French Muscular Dystrophy Association (AFM-  
658 Téléthon #23294) and Agence nationale de la recherche (ANR-20-CE12-0011). We thank all members of  
659 the Department of Signal Transduction and Proteomics, in particular, Isabel Bludau for helpful discussions  
660 regarding the website tool, Igor Paron for MS technical assistance, Mario Oroshi for technical assistance  
661 during website setup, Marta Murgia for helpful discussions on mitochondrial biology and Johannes  
662 Müller-Reif, Patricia Skowronek and Sophia Steigerwald for columns. We are grateful to Jesper Olsen and  
663 Brenda Schulman for constructive and insightful discussions. Figure 1A and Figure 6A were partly created  
664 with BioRender.com.

## 665 Author contributions

666 F.M.H., L.S.K. designed experiments. Mouse work was performed by L.S.K. and I.K.. Proteomic  
667 experiments were conducted by F.M.H. and O.K.. Website was constructed by F.M.H. and I.B.. Data were  
668 analyzed by F.M.H.. All authors contributed to writing and editing of the manuscript.

## 669 Competing interests

670 The authors declare no competing interests.

## References

- Anderson, S., Bankier, A.T., Barrell, B.G., de Bruijn, M.H., Coulson, A.R., Drouin, J., Eperon, I.C., Nierlich, D.P., Roe, B.A., Sanger, F., et al. (1981). Sequence and organization of the human mitochondrial genome. *Nature* *290*, 457-465. [10.1038/290457a0](https://doi.org/10.1038/290457a0).
- Anunciado-Koza, R.P., Zhang, J., Ukropec, J., Bajpeyi, S., Koza, R.A., Rogers, R.C., Cefalu, W.T., Mynatt, R.L., and Kozak, L.P. (2011). Inactivation of the mitochondrial carrier SLC25A25 (ATP-Mg<sup>2+</sup>/Pi transporter) reduces physical endurance and metabolic efficiency in mice. *J Biol Chem* *286*, 11659-11671. [10.1074/jbc.M110.203000](https://doi.org/10.1074/jbc.M110.203000).
- Aponte, A.M., Phillips, D., Hopper, R.K., Johnson, D.T., Harris, R.A., Blinova, K., Boja, E.S., French, S., and Balaban, R.S. (2009). Use of (32)P to study dynamics of the mitochondrial phosphoproteome. *J Proteome Res* *8*, 2679-2695. [10.1021/pr800913j](https://doi.org/10.1021/pr800913j).
- Avadhani, N.G., Sangar, M.C., Bansal, S., and Bajpai, P. (2011). Bimodal targeting of cytochrome P450s to endoplasmic reticulum and mitochondria: the concept of chimeric signals. *FEBS J* *278*, 4218-4229. [10.1111/j.1742-4658.2011.08356.x](https://doi.org/10.1111/j.1742-4658.2011.08356.x).
- Baines, C.P., Zhang, J., Wang, G.W., Zheng, Y.T., Xiu, J.X., Cardwell, E.M., Bolli, R., and Ping, P. (2002). Mitochondrial PKCepsilon and MAPK form signaling modules in the murine heart: enhanced mitochondrial PKCepsilon-MAPK interactions and differential MAPK activation in PKCepsilon-induced cardioprotection. *Circ Res* *90*, 390-397. [10.1161/01.res.0000012702.90501.8d](https://doi.org/10.1161/01.res.0000012702.90501.8d).
- Bak, S., Leon, I.R., Jensen, O.N., and Hojlund, K. (2013). Tissue specific phosphorylation of mitochondrial proteins isolated from rat liver, heart muscle, and skeletal muscle. *J Proteome Res* *12*, 4327-4339. [10.1021/pr400281r](https://doi.org/10.1021/pr400281r).
- Basch, M., Wagner, M., Rolland, S., Carbonell, A., Zeng, R., Khosravi, S., Schmidt, A., Aftab, W., Imhof, A., Wagener, J., et al. (2020). Msp1 cooperates with the proteasome for extraction of arrested mitochondrial import intermediates. *Mol Biol Cell* *31*, 753-767. [10.1091/mbc.E19-06-0329](https://doi.org/10.1091/mbc.E19-06-0329).
- Bayraktar, E.C., Baudrier, L., Ozerdem, C., Lewis, C.A., Chan, S.H., Kunchok, T., Abu-Remaileh, M., Cangelosi, A.L., Sabatini, D.M., Birsoy, K., and Chen, W.W. (2019). MITO-Tag Mice enable rapid isolation and multimodal profiling of mitochondria from specific cell types in vivo. *Proc Natl Acad Sci U S A* *116*, 303-312. [10.1073/pnas.1816656115](https://doi.org/10.1073/pnas.1816656115).
- Bekker-Jensen, D.B., Bernhardt, O.M., Högberg, A., Martínez-Val, A., Verbeke, L., Gandhi, T., Kelstrup, C.D., Reiter, L., and Olsen, J.V. (2020). Rapid and site-specific deep phosphoproteome profiling by data-independent acquisition without the need for spectral libraries. *Nat Commun* *11*, 787. [10.1038/s41467-020-14609-1](https://doi.org/10.1038/s41467-020-14609-1).
- Ben-Menachem, R., Tal, M., Shadur, T., and Pines, O. (2011). A third of the yeast mitochondrial proteome is dual localized: a question of evolution. *Proteomics* *11*, 4468-4476. [10.1002/pmic.201100199](https://doi.org/10.1002/pmic.201100199).
- Beninca, C., Planaguma, J., de Freitas Shuck, A., Acin-Perez, R., Munoz, J.P., de Almeida, M.M., Brown, J.H., Murphy, A.N., Zorzano, A., Enriquez, J.A., and Aragay, A.M. (2014). A new non-canonical pathway of Galpha(q) protein regulating mitochondrial dynamics and bioenergetics. *Cell Signal* *26*, 1135-1146. [10.1016/j.cellsig.2014.01.009](https://doi.org/10.1016/j.cellsig.2014.01.009).
- Benjamini, Y., and Hochberg, Y. (1995). Controlling the False Discovery Rate: A Practical and Powerful Approach to Multiple Testing. *Journal of the Royal Statistical Society: Series B (Methodological)* *57*, 289-300. <https://doi.org/10.1111/j.2517-6161.1995.tb02031.x>.
- Bleazard, W., McCaffery, J.M., King, E.J., Bale, S., Mozdy, A., Tieu, Q., Nunnari, J., and Shaw, J.M. (1999). The dynamin-related GTPase Dnm1 regulates mitochondrial fission in yeast. *Nat Cell Biol* *1*, 298-304. [10.1038/13014](https://doi.org/10.1038/13014).

- Bock, F.J., and Tait, S.W.G. (2020). Mitochondria as multifaceted regulators of cell death. *Nat Rev Mol Cell Biol* 21, 85-100. 10.1038/s41580-019-0173-8.
- Bohnert, M., Zerbes, R.M., Davies, K.M., Muhleip, A.W., Rampelt, H., Horvath, S.E., Boenke, T., Kram, A., Perschil, I., Veenhuis, M., et al. (2015). Central role of Mic10 in the mitochondrial contact site and cristae organizing system. *Cell Metab* 21, 747-755. 10.1016/j.cmet.2015.04.007.
- Boja, E.S., Phillips, D., French, S.A., Harris, R.A., and Balaban, R.S. (2009). Quantitative mitochondrial phosphoproteomics using iTRAQ on an LTQ-Orbitrap with high energy collision dissociation. *J Proteome Res* 8, 4665-4675. 10.1021/pr900387b.
- Calvo, S.E., and Mootha, V.K. (2010). The mitochondrial proteome and human disease. *Annu Rev Genomics Hum Genet* 11, 25-44. 10.1146/annurev-genom-082509-141720.
- Cereghetti, G.M., Stangherlin, A., Martins de Brito, O., Chang, C.R., Blackstone, C., Bernardi, P., and Scorrano, L. (2008). Dephosphorylation by calcineurin regulates translocation of Drp1 to mitochondria. *Proc Natl Acad Sci U S A* 105, 15803-15808. 10.1073/pnas.0808249105.
- Cioni, J.M., Lin, J.Q., Holtermann, A.V., Koppers, M., Jakobs, M.A.H., Azizi, A., Turner-Bridger, B., Shigeoka, T., Franze, K., Harris, W.A., and Holt, C.E. (2019). Late Endosomes Act as mRNA Translation Platforms and Sustain Mitochondria in Axons. *Cell* 176, 56-72 e15. 10.1016/j.cell.2018.11.030.
- Colina-Tenorio, L., Horten, P., Pfanner, N., and Rampelt, H. (2020). Shaping the mitochondrial inner membrane in health and disease. *J Intern Med* 287, 645-664. 10.1111/joim.13031.
- Cribari-Neto, F., and Zeileis, A. (2010). Beta Regression in R. *J Stat Softw* 34, 1-24.
- Cribbs, J.T., and Strack, S. (2007). Reversible phosphorylation of Drp1 by cyclic AMP-dependent protein kinase and calcineurin regulates mitochondrial fission and cell death. *EMBO Rep* 8, 939-944. 10.1038/sj.embor.7401062.
- Cui, Z., Hou, J., Chen, X., Li, J., Xie, Z., Xue, P., Cai, T., Wu, P., Xu, T., and Yang, F. (2010). The profile of mitochondrial proteins and their phosphorylation signaling network in INS-1 beta cells. *J Proteome Res* 9, 2898-2908. 10.1021/pr100139z.
- del Arco, A., and Satrustegui, J. (2004). Identification of a novel human subfamily of mitochondrial carriers with calcium-binding domains. *J Biol Chem* 279, 24701-24713. 10.1074/jbc.M401417200.
- Deng, N., Zhang, J., Zong, C., Wang, Y., Lu, H., Yang, P., Wang, W., Young, G.W., Wang, Y., Korge, P., et al. (2011). Phosphoproteome analysis reveals regulatory sites in major pathways of cardiac mitochondria. *Mol Cell Proteomics* 10, M110 000117. 10.1074/mcp.M110.000117.
- Deng, W.J., Nie, S., Dai, J., Wu, J.R., and Zeng, R. (2010). Proteome, phosphoproteome, and hydroxyproteome of liver mitochondria in diabetic rats at early pathogenic stages. *Mol Cell Proteomics* 9, 100-116. 10.1074/mcp.M900020-MCP200.
- Desai, R., East, D.A., Hardy, L., Faccenda, D., Rigon, M., Crosby, J., Alvarez, M.S., Singh, A., Mainenti, M., Hussey, L.K., et al. (2020). Mitochondria form contact sites with the nucleus to couple prosurvival retrograde response. *Sci Adv* 6. 10.1126/sciadv.abc9955.
- Dikov, D., and Reichert, A.S. (2011). How to split up: lessons from mitochondria. *EMBO J* 30, 2751-2753. 10.1038/emboj.2011.219.
- Ducommun, S., Deak, M., Sumpton, D., Ford, R.J., Nunez Galindo, A., Kussmann, M., Viollet, B., Steinberg, G.R., Foretz, M., Dayon, L., et al. (2015). Motif affinity and mass spectrometry proteomic approach for the discovery of cellular AMPK targets: identification of mitochondrial fission factor as a new AMPK substrate. *Cell Signal* 27, 978-988. 10.1016/j.cellsig.2015.02.008.
- Fecher, C., Trovo, L., Muller, S.A., Snaidero, N., Wettmarshausen, J., Heink, S., Ortiz, O., Wagner, I., Kuhn, R., Hartmann, J., et al. (2019). Cell-type-specific profiling of brain mitochondria reveals functional and molecular diversity. *Nat Neurosci* 22, 1731-1742. 10.1038/s41593-019-0479-z.
- Feng, J., Zhu, M., Schaub, M.C., Gehrig, P., Roschitzki, B., Lucchinetti, E., and Zaugg, M. (2008). Phosphoproteome analysis of isoflurane-protected heart mitochondria: phosphorylation of adenine



- nucleotide translocator-1 on Tyr194 regulates mitochondrial function. *Cardiovasc Res* *80*, 20-29. 10.1093/cvr/cvn161.
- Ferreira, R., Vitorino, R., Alves, R.M., Appell, H.J., Powers, S.K., Duarte, J.A., and Amado, F. (2010). Subsarcolemmal and intermyofibrillar mitochondria proteome differences disclose functional specializations in skeletal muscle. *Proteomics* *10*, 3142-3154. 10.1002/pmic.201000173.
- Fiermonte, G., De Leonadis, F., Todisco, S., Palmieri, L., Lasorsa, F.M., and Palmieri, F. (2004). Identification of the mitochondrial ATP-Mg/Pi transporter. Bacterial expression, reconstitution, functional characterization, and tissue distribution. *J Biol Chem* *279*, 30722-30730. 10.1074/jbc.M400445200.
- Forner, F., Foster, L.J., Campanaro, S., Valle, G., and Mann, M. (2006). Quantitative proteomic comparison of rat mitochondria from muscle, heart, and liver. *Mol Cell Proteomics* *5*, 608-619. 10.1074/mcp.M500298-MCP200.
- Frezza, C., Cipolat, S., and Scorrano, L. (2007). Organelle isolation: functional mitochondria from mouse liver, muscle and cultured fibroblasts. *Nat Protoc* *2*, 287-295. 10.1038/nprot.2006.478.
- Gao, C., Xu, Y., Liang, Z., Wang, Y., Shang, Q., Zhang, S., Wang, C., Ni, M., Wu, D., Huang, Z., and Pang, T. (2021). A novel PGAM5 inhibitor LFHP-1c protects blood-brain barrier integrity in ischemic stroke. *Acta Pharm Sin B* *11*, 1867-1884. 10.1016/j.apsb.2021.01.008.
- Genter, M.B., Clay, C.D., Dalton, T.P., Dong, H., Nebert, D.W., and Shertzer, H.G. (2006). Comparison of mouse hepatic mitochondrial versus microsomal cytochromes P450 following TCDD treatment. *Biochem Biophys Res Commun* *342*, 1375-1381. 10.1016/j.bbrc.2006.02.121.
- Grimsrud, P.A., Carson, J.J., Hebert, A.S., Hubler, S.L., Niemi, N.M., Bailey, D.J., Jochem, A., Stapleton, D.S., Keller, M.P., Westphall, M.S., et al. (2012). A quantitative map of the liver mitochondrial phosphoproteome reveals posttranslational control of ketogenesis. *Cell Metab* *16*, 672-683. 10.1016/j.cmet.2012.10.004.
- Grun, B., Kosmidis, I., and Zeileis, A. (2012). Extended Beta Regression in R: Shaken, Stirred, Mixed, and Partitioned. *J Stat Softw* *48*, 1-25.
- Guedouari, H., Savoie, M.C., Jean, S., Djeungoue-Petga, M.A., Pichaud, N., and Hebert-Chatelain, E. (2020). Multi-omics Reveal that c-Src Modulates the Mitochondrial Phosphotyrosine Proteome and Metabolism According to Nutrient Availability. *Cell Physiol Biochem* *54*, 517-537. 10.33594/000000237.
- Hagberg, A., Swart, P., and S Chult, D. (2008). Exploring network structure, dynamics, and function using NetworkX. Los Alamos National Lab.(LANL), Los Alamos, NM (United States).
- Hebert-Chatelain, E., Desprez, T., Serrat, R., Bellocchio, L., Soria-Gomez, E., Busquets-Garcia, A., Pagano Zottola, A.C., Delamarre, A., Cannich, A., Vincent, P., et al. (2016). A cannabinoid link between mitochondria and memory. *Nature* *539*, 555-559. 10.1038/nature20127.
- Hitosugi, T., Fan, J., Chung, T.W., Lythgoe, K., Wang, X., Xie, J., Ge, Q., Gu, T.L., Polakiewicz, R.D., Roesel, J.L., et al. (2011). Tyrosine phosphorylation of mitochondrial pyruvate dehydrogenase kinase 1 is important for cancer metabolism. *Mol Cell* *44*, 864-877. 10.1016/j.molcel.2011.10.015.
- Hopper, R.K., Carroll, S., Aponte, A.M., Johnson, D.T., French, S., Shen, R.F., Witzmann, F.A., Harris, R.A., and Balaban, R.S. (2006). Mitochondrial matrix phosphoproteome: effect of extra mitochondrial calcium. *Biochemistry* *45*, 2524-2536. 10.1021/bi052475e.
- Horn, H., Schoof, E.M., Kim, J., Robin, X., Miller, M.L., Diella, F., Palma, A., Cesareni, G., Jensen, L.J., and Linding, R. (2014). KinomeXplorer: an integrated platform for kinome biology studies. *Nat Methods* *11*, 603-604. 10.1038/nmeth.2968.
- Hornbeck, P.V., Kornhauser, J.M., Tkachev, S., Zhang, B., Skrzypek, E., Murray, B., Latham, V., and Sullivan, M. (2012). PhosphoSitePlus: a comprehensive resource for investigating the structure and function of experimentally determined post-translational modifications in man and mouse. *Nucleic Acids Res* *40*, D261-270. 10.1093/nar/gkr1122.

- Huang, B., Gudi, R., Wu, P., Harris, R.A., Hamilton, J., and Popov, K.M. (1998). Isoenzymes of pyruvate dehydrogenase phosphatase. DNA-derived amino acid sequences, expression, and regulation. *J Biol Chem* 273, 17680-17688. 10.1074/jbc.273.28.17680.
- Huang, B., Wu, P., Popov, K.M., and Harris, R.A. (2003). Starvation and diabetes reduce the amount of pyruvate dehydrogenase phosphatase in rat heart and kidney. *Diabetes* 52, 1371-1376. 10.2337/diabetes.52.6.1371.
- Humphrey, S.J., Karayel, O., James, D.E., and Mann, M. (2018). High-throughput and high-sensitivity phosphoproteomics with the EasyPhos platform. *Nat Protoc* 13, 1897-1916. 10.1038/s41596-018-0014-9.
- Huttemann, M., Lee, I., Samavati, L., Yu, H., and Doan, J.W. (2007). Regulation of mitochondrial oxidative phosphorylation through cell signaling. *Biochim Biophys Acta* 1773, 1701-1720. 10.1016/j.bbamcr.2007.10.001.
- Jaburek, M., Costa, A.D., Burton, J.R., Costa, C.L., and Garlid, K.D. (2006). Mitochondrial PKC epsilon and mitochondrial ATP-sensitive K<sup>+</sup> channel copurify and coreconstitute to form a functioning signaling module in proteoliposomes. *Circ Res* 99, 878-883. 10.1161/01.RES.0000245106.80628.d3.
- Jadiya, P., and Tomar, D. (2020). Mitochondrial Protein Quality Control Mechanisms. *Genes (Basel)* 11. 10.3390/genes11050563.
- Jastroch, M., Divakaruni, A.S., Mookerjee, S., Treberg, J.R., and Brand, M.D. (2010). Mitochondrial proton and electron leaks. *Essays Biochem* 47, 53-67. 10.1042/bse0470053.
- Johnson, D.T., Harris, R.A., French, S., Blair, P.V., You, J., Bemis, K.G., Wang, M., and Balaban, R.S. (2007). Tissue heterogeneity of the mammalian mitochondrial proteome. *Am J Physiol Cell Physiol* 292, C689-697. 10.1152/ajpcell.00108.2006.
- Jumper, J., Evans, R., Pritzel, A., Green, T., Figurnov, M., Ronneberger, O., Tunyasuvunakool, K., Bates, R., Zidek, A., Potapenko, A., et al. (2021). Highly accurate protein structure prediction with AlphaFold. *Nature* 596, 583-589. 10.1038/s41586-021-03819-2.
- Kajimura, S., and Saito, M. (2014). A new era in brown adipose tissue biology: molecular control of brown fat development and energy homeostasis. *Annu Rev Physiol* 76, 225-249. 10.1146/annurev-physiol-021113-170252.
- Kappler, L., Li, J., Haring, H.U., Weigert, C., Lehmann, R., Xu, G., and Hoene, M. (2016). Purity matters: A workflow for the valid high-resolution lipid profiling of mitochondria from cell culture samples. *Sci Rep* 6, 21107. 10.1038/srep21107.
- Khosravi, S., and Harner, M.E. (2020). The MICOS complex, a structural element of mitochondria with versatile functions. *Biol Chem* 401, 765-778. 10.1515/hsz-2020-0103.
- Klyuyeva, A., Tuganova, A., Kedishvili, N., and Popov, K.M. (2019). Tissue-specific kinase expression and activity regulate flux through the pyruvate dehydrogenase complex. *J Biol Chem* 294, 838-851. 10.1074/jbc.RA118.006433.
- Kodron, A., Mussulini, B.H., Pilecka, I., and Chacinska, A. (2021). The ubiquitin-proteasome system and its crosstalk with mitochondria as therapeutic targets in medicine. *Pharmacol Res* 163, 105248. 10.1016/j.phrs.2020.105248.
- Kolitsida, P., Zhou, J., Rackiewicz, M., Nolic, V., Dengjel, J., and Abeliovich, H. (2019). Phosphorylation of mitochondrial matrix proteins regulates their selective mitophagic degradation. *Proc Natl Acad Sci U S A* 116, 20517-20527. 10.1073/pnas.1901759116.
- Kotrasova, V., Keresztesova, B., Ondrovicova, G., Bauer, J.A., Havalova, H., Pevala, V., Kutejova, E., and Kunova, N. (2021). Mitochondrial Kinases and the Role of Mitochondrial Protein Phosphorylation in Health and Disease. *Life (Basel)* 11. 10.3390/life11020082.
- Kruse, R., and Hojlund, K. (2017). Mitochondrial phosphoproteomics of mammalian tissues. *Mitochondrion* 33, 45-57. 10.1016/j.mito.2016.08.004.

- Kuhl, I., Miranda, M., Atanassov, I., Kuznetsova, I., Hinze, Y., Mourier, A., Filipovska, A., and Larsson, N.G. (2017). Transcriptomic and proteomic landscape of mitochondrial dysfunction reveals secondary coenzyme Q deficiency in mammals. *Elife* 6. 10.7554/eLife.30952.
- Kulak, N.A., Pichler, G., Paron, I., Nagaraj, N., and Mann, M. (2014). Minimal, encapsulated proteomic-sample processing applied to copy-number estimation in eukaryotic cells. *Nat Methods* 11, 319-324. 10.1038/nmeth.2834.
- Kunji, E.R.S., King, M.S., Ruprecht, J.J., and Thangaratnarajah, C. (2020). The SLC25 Carrier Family: Important Transport Proteins in Mitochondrial Physiology and Pathology. *Physiology (Bethesda)* 35, 302-327. 10.1152/physiol.00009.2020.
- Kuznetsov, A.V., Hermann, M., Saks, V., Hengster, P., and Margreiter, R. (2009). The cell-type specificity of mitochondrial dynamics. *Int J Biochem Cell Biol* 41, 1928-1939. 10.1016/j.biocel.2009.03.007.
- Kwak, C., Shin, S., Park, J.S., Jung, M., Nhung, T.T.M., Kang, M.G., Lee, C., Kwon, T.H., Park, S.K., Mun, J.Y., et al. (2020). Contact-ID, a tool for profiling organelle contact sites, reveals regulatory proteins of mitochondrial-associated membrane formation. *Proc Natl Acad Sci U S A* 117, 12109-12120. 10.1073/pnas.1916584117.
- Lashkevich, K.A., and Dmitriev, S.E. (2021). mRNA Targeting, Transport and Local Translation in Eukaryotic Cells: From the Classical View to a Diversity of New Concepts. *Mol Biol*, 1-31. 10.1134/S0026893321030080.
- Lee, J., Xu, Y., Chen, Y., Sprung, R., Kim, S.C., Xie, S., and Zhao, Y. (2007). Mitochondrial phosphoproteome revealed by an improved IMAC method and MS/MS/MS. *Mol Cell Proteomics* 6, 669-676. 10.1074/mcp.M600218-MCP200.
- Lewandrowski, U., Sickmann, A., Cesaro, L., Brunati, A.M., Toninello, A., and Salvi, M. (2008). Identification of new tyrosine phosphorylated proteins in rat brain mitochondria. *FEBS Lett* 582, 1104-1110. 10.1016/j.febslet.2008.02.077.
- Lewis, S.M., Williams, A., and Eisenbarth, S.C. (2019). Structure and function of the immune system in the spleen. *Sci Immunol* 4. 10.1126/sciimmunol.aau6085.
- Lewis, T.L., Jr., Kwon, S.K., Lee, A., Shaw, R., and Polleux, F. (2018). MFF-dependent mitochondrial fission regulates presynaptic release and axon branching by limiting axonal mitochondria size. *Nat Commun* 9, 5008. 10.1038/s41467-018-07416-2.
- Li, N., Qian, S., Li, B., and Zhan, X. (2019). Quantitative analysis of the human ovarian carcinoma mitochondrial phosphoproteome. *Aging (Albany NY)* 11, 6449-6468. 10.18632/aging.102199.
- Liang, M.Z., Ke, T.L., and Chen, L. (2021). Mitochondrial Protein PGAM5 Emerges as a New Regulator in Neurological Diseases. *Front Mol Neurosci* 14, 730604. 10.3389/fnmol.2021.730604.
- Liesa, M., Palacin, M., and Zorzano, A. (2009). Mitochondrial dynamics in mammalian health and disease. *Physiol Rev* 89, 799-845. 10.1152/physrev.00030.2008.
- Liu, T., Yu, R., Jin, S.B., Han, L., Lendahl, U., Zhao, J., and Nister, M. (2013). The mitochondrial elongation factors MIEF1 and MIEF2 exert partially distinct functions in mitochondrial dynamics. *Exp Cell Res* 319, 2893-2904. 10.1016/j.yexcr.2013.07.010.
- Liu, Y.J., McIntyre, R.L., Janssens, G.E., and Houtkooper, R.H. (2020). Mitochondrial fission and fusion: A dynamic role in aging and potential target for age-related disease. *Mech Ageing Dev* 186, 111212. 10.1016/j.mad.2020.111212.
- Loson, O.C., Song, Z., Chen, H., and Chan, D.C. (2013). Fis1, Mff, MiD49, and MiD51 mediate Drp1 recruitment in mitochondrial fission. *Mol Biol Cell* 24, 659-667. 10.1091/mbc.E12-10-0721.
- Lu, W., Karuppagounder, S.S., Springer, D.A., Allen, M.D., Zheng, L., Chao, B., Zhang, Y., Dawson, V.L., Dawson, T.M., and Lenardo, M. (2014). Genetic deficiency of the mitochondrial protein PGAM5 causes a Parkinson's-like movement disorder. *Nat Commun* 5, 4930. 10.1038/ncomms5930.

- Majumder, P.K., Pandey, P., Sun, X., Cheng, K., Datta, R., Saxena, S., Kharbanda, S., and Kufe, D. (2000). Mitochondrial translocation of protein kinase C delta in phorbol ester-induced cytochrome c release and apoptosis. *J Biol Chem* 275, 21793-21796. 10.1074/jbc.C000048200.
- McBride, H.M., Neuspiel, M., and Wasiak, S. (2006). Mitochondria: more than just a powerhouse. *Curr Biol* 16, R551-560. 10.1016/j.cub.2006.06.054.
- McLaughlin, K.L., Hagen, J.T., Coalson, H.S., Nelson, M.A.M., Kew, K.A., Wooten, A.R., and Fisher-Wellman, K.H. (2020). Novel approach to quantify mitochondrial content and intrinsic bioenergetic efficiency across organs. *Sci Rep* 10, 17599. 10.1038/s41598-020-74718-1.
- Menacho, C., and Prigione, A. (2020). Tackling mitochondrial diversity in brain function: from animal models to human brain organoids. *Int J Biochem Cell Biol* 123, 105760. 10.1016/j.biocel.2020.105760.
- Montes de Oca Balderas, P. (2021). Mitochondria-plasma membrane interactions and communication. *J Biol Chem* 297, 101164. 10.1016/j.jbc.2021.101164.
- Moore, A.S., and Holzbaur, E.L.F. (2018). Mitochondrial-cytoskeletal interactions: dynamic associations that facilitate network function and remodeling. *Curr Opin Physiol* 3, 94-100. 10.1016/j.cophys.2018.03.003.
- Mootha, V.K., Bunkenborg, J., Olsen, J.V., Hjerrild, M., Wisniewski, J.R., Stahl, E., Bolouri, M.S., Ray, H.N., Sihag, S., Kamal, M., et al. (2003). Integrated analysis of protein composition, tissue diversity, and gene regulation in mouse mitochondria. *Cell* 115, 629-640. 10.1016/s0092-8674(03)00926-7.
- Morgenstern, M., Peikert, C.D., Lubbert, P., Suppanz, I., Klemm, C., Alka, O., Steiert, C., Naumenko, N., Schendzielorz, A., Melchionda, L., et al. (2021). Quantitative high-confidence human mitochondrial proteome and its dynamics in cellular context. *Cell Metab*. 10.1016/j.cmet.2021.11.001.
- Niemi, N.M., and Pagliarini, D.J. (2021). The extensive and functionally uncharacterized mitochondrial phosphoproteome. *J Biol Chem*, 100880. 10.1016/j.jbc.2021.100880.
- Nunnari, J., and Suomalainen, A. (2012). Mitochondria: in sickness and in health. *Cell* 148, 1145-1159. 10.1016/j.cell.2012.02.035.
- Oelkrug, R., Polymeropoulos, E.T., and Jastroch, M. (2015). Brown adipose tissue: physiological function and evolutionary significance. *J Comp Physiol B* 185, 587-606. 10.1007/s00360-015-0907-7.
- Ogbi, M., and Johnson, J.A. (2006). Protein kinase Cepsilon interacts with cytochrome c oxidase subunit IV and enhances cytochrome c oxidase activity in neonatal cardiac myocyte preconditioning. *Biochem J* 393, 191-199. 10.1042/BJ20050757.
- Pagliarini, D.J., Calvo, S.E., Chang, B., Sheth, S.A., Vafai, S.B., Ong, S.E., Walford, G.A., Sugiana, C., Boneh, A., Chen, W.K., et al. (2008). A mitochondrial protein compendium elucidates complex I disease biology. *Cell* 134, 112-123. 10.1016/j.cell.2008.06.016.
- Palmieri, F., and Monne, M. (2016). Discoveries, metabolic roles and diseases of mitochondrial carriers: A review. *Biochim Biophys Acta* 1863, 2362-2378. 10.1016/j.bbamcr.2016.03.007.
- Panda, S., Srivastava, S., Li, Z., Vaeth, M., Fuhs, S.R., Hunter, T., and Skolnik, E.Y. (2016). Identification of PGAM5 as a Mammalian Protein Histidine Phosphatase that Plays a Central Role to Negatively Regulate CD4(+) T Cells. *Mol Cell* 63, 457-469. 10.1016/j.molcel.2016.06.021.
- Patel, M.S., Nemeria, N.S., Furey, W., and Jordan, F. (2014). The pyruvate dehydrogenase complexes: structure-based function and regulation. *J Biol Chem* 289, 16615-16623. 10.1074/jbc.R114.563148.
- Perrone, M., Carocchia, N., Genovese, I., Missiroli, S., Modesti, L., Pedriali, G., Vezzani, B., Vitto, V.A.M., Antenori, M., Lebedzinska-Arciszewska, M., et al. (2020). The role of mitochondria-associated membranes in cellular homeostasis and diseases. *Int Rev Cell Mol Biol* 350, 119-196. 10.1016/bs.ircmb.2019.11.002.
- Ping, P., Song, C., Zhang, J., Guo, Y., Cao, X., Li, R.C., Wu, W., Vondriska, T.M., Pass, J.M., Tang, X.L., et al. (2002). Formation of protein kinase C(epsilon)-Lck signaling modules confers cardioprotection. *J Clin Invest* 109, 499-507. 10.1172/JCI13200.

- Rangaraju, V., Lauterbach, M., and Schuman, E.M. (2019). Spatially Stable Mitochondrial Compartments Fuel Local Translation during Plasticity. *Cell* 176, 73-84 e15. 10.1016/j.cell.2018.12.013.
- Rath, S., Sharma, R., Gupta, R., Ast, T., Chan, C., Durham, T.J., Goodman, R.P., Grabarek, Z., Haas, M.E., Hung, W.H.W., et al. (2021). MitoCarta3.0: an updated mitochondrial proteome now with sub-organelle localization and pathway annotations. *Nucleic Acids Res* 49, D1541-D1547. 10.1093/nar/gkaa1011.
- Roberts, R.F., Bayne, A.N., Goiran, T., Levesque, D., Boisvert, F.M., Trempe, J.F., and Fon, E.A. (2021). Proteomic Profiling of Mitochondrial-Derived Vesicles in Brain Reveals Enrichment of Respiratory Complex Sub-assemblies and Small TIM Chaperones. *J Proteome Res* 20, 506-517. 10.1021/acs.jproteome.0c00506.
- Robin, M.A., Anandatheerthavarada, H.K., Fang, J.K., Cudic, M., Otvos, L., and Avadhani, N.G. (2001). Mitochondrial targeted cytochrome P450 2E1 (P450 MT5) contains an intact N terminus and requires mitochondrial specific electron transfer proteins for activity. *J Biol Chem* 276, 24680-24689. 10.1074/jbc.M100363200.
- Rochette, L., Meloux, A., Zeller, M., Malka, G., Cottin, Y., and Vergely, C. (2020). Mitochondrial SLC25 Carriers: Novel Targets for Cancer Therapy. *Molecules* 25. 10.3390/molecules25102417.
- Rueda, C.B., Traba, J., Amigo, I., Llorente-Folch, I., Gonzalez-Sanchez, P., Pardo, B., Esteban, J.A., del Arco, A., and Satrustegui, J. (2015). Mitochondrial ATP-Mg/Pi carrier SCA23/SLC25A23 counteracts PARP-1-dependent fall in mitochondrial ATP caused by excitotoxic insults in neurons. *J Neurosci* 35, 3566-3581. 10.1523/JNEUROSCI.2702-14.2015.
- Ruprecht, J.J., and Kunji, E.R.S. (2020). The SLC25 Mitochondrial Carrier Family: Structure and Mechanism. *Trends Biochem Sci* 45, 244-258. 10.1016/j.tibs.2019.11.001.
- Russell, O.M., Gorman, G.S., Lightowers, R.N., and Turnbull, D.M. (2020). Mitochondrial Diseases: Hope for the Future. *Cell* 181, 168-188. 10.1016/j.cell.2020.02.051.
- Sadana, P., Geyer, R., Pezoldt, J., Helmsing, S., Huehn, J., Hust, M., Dersch, P., and Scrima, A. (2018). The invasins D protein from *Yersinia pseudotuberculosis* selectively binds the Fab region of host antibodies and affects colonization of the intestine. *J Biol Chem* 293, 8672-8690. 10.1074/jbc.RA117.001068.
- Sandhu, S.K., Fassan, M., Volinia, S., Lovat, F., Balatti, V., Pekarsky, Y., and Croce, C.M. (2013). B-cell malignancies in microRNA Emu-miR-17~92 transgenic mice. *Proc Natl Acad Sci U S A* 110, 18208-18213. 10.1073/pnas.1315365110.
- Sathe, G., Deepha, S., Gayathri, N., Nagappa, M., Parayil Sankaran, B., Taly, A.B., Khanna, T., Pandey, A., and Govindaraj, P. (2021). Ethylmalonic encephalopathy ETHE1 p. D165H mutation alters the mitochondrial function in human skeletal muscle proteome. *Mitochondrion* 58, 64-71. 10.1016/j.mito.2021.02.011.
- Schober, F.A., Atanassov, I., Moore, D., Calvo-Garrido, J., Moedas, M.F., Wedell, A., Freyer, C., and Wredenber, A. (2021). Stable Isotope Labeling of Amino Acids in Flies (SILAF) Reveals Differential Phosphorylation of Mitochondrial Proteins Upon Loss of OXPHOS Subunits. *Mol Cell Proteomics* 20, 100065. 10.1016/j.mcpro.2021.100065.
- Schulenberg, B., Aggeler, R., Beechem, J.M., Capaldi, R.A., and Patton, W.F. (2003). Analysis of steady-state protein phosphorylation in mitochondria using a novel fluorescent phosphosensor dye. *J Biol Chem* 278, 27251-27255. 10.1074/jbc.C300189200.
- Shai, N., Yifrach, E., van Roermund, C.W.T., Cohen, N., Bibi, C., L, I.J., Cavellini, L., Meurisse, J., Schuster, R., Zada, L., et al. (2018). Systematic mapping of contact sites reveals tethers and a function for the peroxisome-mitochondria contact. *Nat Commun* 9, 1761. 10.1038/s41467-018-03957-8.
- Silva Ramos, E., Motori, E., Bruser, C., Kuhl, I., Yeroslaviz, A., Ruzzenente, B., Kauppila, J.H.K., Busch, J.D., Hultenby, K., Habermann, B.H., et al. (2019). Mitochondrial fusion is required for regulation of mitochondrial DNA replication. *PLoS Genet* 15, e1008085. 10.1371/journal.pgen.1008085.

- Smith, A.C., and Robinson, A.J. (2019). MitoMiner v4.0: an updated database of mitochondrial localization evidence, phenotypes and diseases. *Nucleic Acids Res* 47, D1225-D1228. 10.1093/nar/gky1072.
- Spinelli, J.B., and Haigis, M.C. (2018). The multifaceted contributions of mitochondria to cellular metabolism. *Nat Cell Biol* 20, 745-754. 10.1038/s41556-018-0124-1.
- Suomalainen, A., and Battersby, B.J. (2018). Mitochondrial diseases: the contribution of organelle stress responses to pathology. *Nat Rev Mol Cell Biol* 19, 77-92. 10.1038/nrm.2017.66.
- Taguchi, N., Ishihara, N., Jofuku, A., Oka, T., and Mihara, K. (2007). Mitotic phosphorylation of dynamin-related GTPase Drp1 participates in mitochondrial fission. *J Biol Chem* 282, 11521-11529. 10.1074/jbc.M607279200.
- Toyama, E.Q., Herzig, S., Courchet, J., Lewis, T.L., Jr., Loson, O.C., Hellberg, K., Young, N.P., Chen, H., Polleux, F., Chan, D.C., and Shaw, R.J. (2016). Metabolism. AMP-activated protein kinase mediates mitochondrial fission in response to energy stress. *Science* 351, 275-281. 10.1126/science.aab4138.
- Traba, J., Del Arco, A., Duchon, M.R., Szabadkai, G., and Satrustegui, J. (2012). SCaMC-1 promotes cancer cell survival by desensitizing mitochondrial permeability transition via ATP/ADP-mediated matrix Ca(2+) buffering. *Cell Death Differ* 19, 650-660. 10.1038/cdd.2011.139.
- van der Blik, A.M., Shen, Q., and Kawajiri, S. (2013). Mechanisms of mitochondrial fission and fusion. *Cold Spring Harb Perspect Biol* 5. 10.1101/cshperspect.a011072.
- Ventura-Clapier, R., Garnier, A., Veksler, V., and Joubert, F. (2011). Bioenergetics of the failing heart. *Biochim Biophys Acta* 1813, 1360-1372. 10.1016/j.bbamcr.2010.09.006.
- Volkert, M.R., and Crowley, D.J. (2020). Preventing Neurodegeneration by Controlling Oxidative Stress: The Role of OXR1. *Front Neurosci* 14, 611904. 10.3389/fnins.2020.611904.
- Voytik, E., Bludau, I., Willems, S., Hansen, F.M., Brunner, A.D., Strauss, M.T., and Mann, M. (2021). AlphaMap: an open-source python package for the visual annotation of proteomics data with sequence specific knowledge. *Bioinformatics*. 10.1093/bioinformatics/btab674.
- Watanabe, T., Saotome, M., Nobuhara, M., Sakamoto, A., Urushida, T., Katoh, H., Satoh, H., Funaki, M., and Hayashi, H. (2014). Roles of mitochondrial fragmentation and reactive oxygen species in mitochondrial dysfunction and myocardial insulin resistance. *Exp Cell Res* 323, 314-325. 10.1016/j.yexcr.2014.02.027.
- Wieckowski, M.R., Giorgi, C., Lebiedzinska, M., Duszynski, J., and Pinton, P. (2009). Isolation of mitochondria-associated membranes and mitochondria from animal tissues and cells. *Nature Protocols* 4, 1582-1590. 10.1038/nprot.2009.151.
- Williams, E.G., Wu, Y., Wolski, W., Kim, J.Y., Lan, J., Hasan, M., Halter, C., Jha, P., Ryu, D., Auwerx, J., and Aebersold, R. (2018). Quantifying and Localizing the Mitochondrial Proteome Across Five Tissues in A Mouse Population. *Mol Cell Proteomics* 17, 1766-1777. 10.1074/mcp.RA118.000554.
- Xu, L., Wang, X., Zhou, J., Qiu, Y., Shang, W., Liu, J.P., Wang, L., and Tong, C. (2020). Miga-mediated endoplasmic reticulum-mitochondria contact sites regulate neuronal homeostasis. *Elife* 9. 10.7554/eLife.56584.
- Zeileis, A., and Hothorn, T. (2015). Diagnostic Checking in Regression Relationships.
- Zhang, Y., Liu, X., Bai, J., Tian, X., Zhao, X., Liu, W., Duan, X., Shang, W., Fan, H.Y., and Tong, C. (2016). Mitoguardin Regulates Mitochondrial Fusion through MitoPLD and Is Required for Neuronal Homeostasis. *Mol Cell* 61, 111-124. 10.1016/j.molcel.2015.11.017.
- Zhao, X., Bak, S., Pedersen, A.J., Jensen, O.N., and Hojlund, K. (2014). Insulin increases phosphorylation of mitochondrial proteins in human skeletal muscle in vivo. *J Proteome Res* 13, 2359-2369. 10.1021/pr401163t.
- Zhao, X., Leon, I.R., Bak, S., Mogensen, M., Wrzesinski, K., Hojlund, K., and Jensen, O.N. (2011). Phosphoproteome analysis of functional mitochondria isolated from resting human muscle reveals

extensive phosphorylation of inner membrane protein complexes and enzymes. *Mol Cell Proteomics* 10, M110 000299. 10.1074/mcp.M110.000299.

## List of figure supplements

Figure 2 – figure supplement 1 Mitochondria enriched samples show tissue-specific clustering

Figure 4 – figure supplement 1 Gene Ontology enrichment displays tissue specificity

Figure 6 – figure supplement 1 Sequence annotation highlights phosphorylation clusters on MIGA2

Figure 6 – figure supplement 2 Localization distribution of mitochondrial phosphoproteome diverges from mitochondrial proteome

## List of Source Data

Figure 1 – Source Data 1

Figure 1 – Source Data 2

Figure 1 – Source Data 3

Figure 1 – Source Data 4

Figure 1 – Source Data 5

Figure 1 – Source Data 6

Figure 1 – Source Data 7

## List of Supplementary Files

Supplementary Table 1 Overview of mitochondrial phosphoproteome studies in mammalian tissue

Supplementary File 1 Coefficient of variation and dynamic range of protein identification

Supplementary File 2 Mitochondrial protein intensity ranking



## **Supplementary Figures**

### **Mitochondrial phosphoproteomes are functionally specialized across tissues**

**Fynn M. Hansen, Laura S. Kremer, Ozge Karayel, Inge Köhl, Isabell Bludau, Nils-Göran Larsson, Matthias Mann**

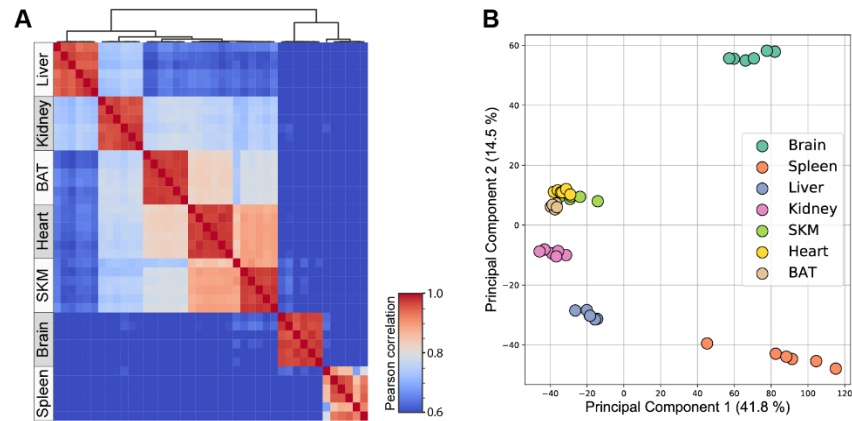

## Figure 2 – figure supplement 1 Mitochondria enriched samples show tissue-specific clustering

(A) Heatmap showing Pearson correlations for biological replicates (n=6) for proteins of all mitochondrial enriched samples. (B) Principal component analysis of all proteins of all acquired biological replicates (n=6) (Figure 2 – Source Data 1). Skeletal muscle (SKM), brown adipose tissue (BAT).

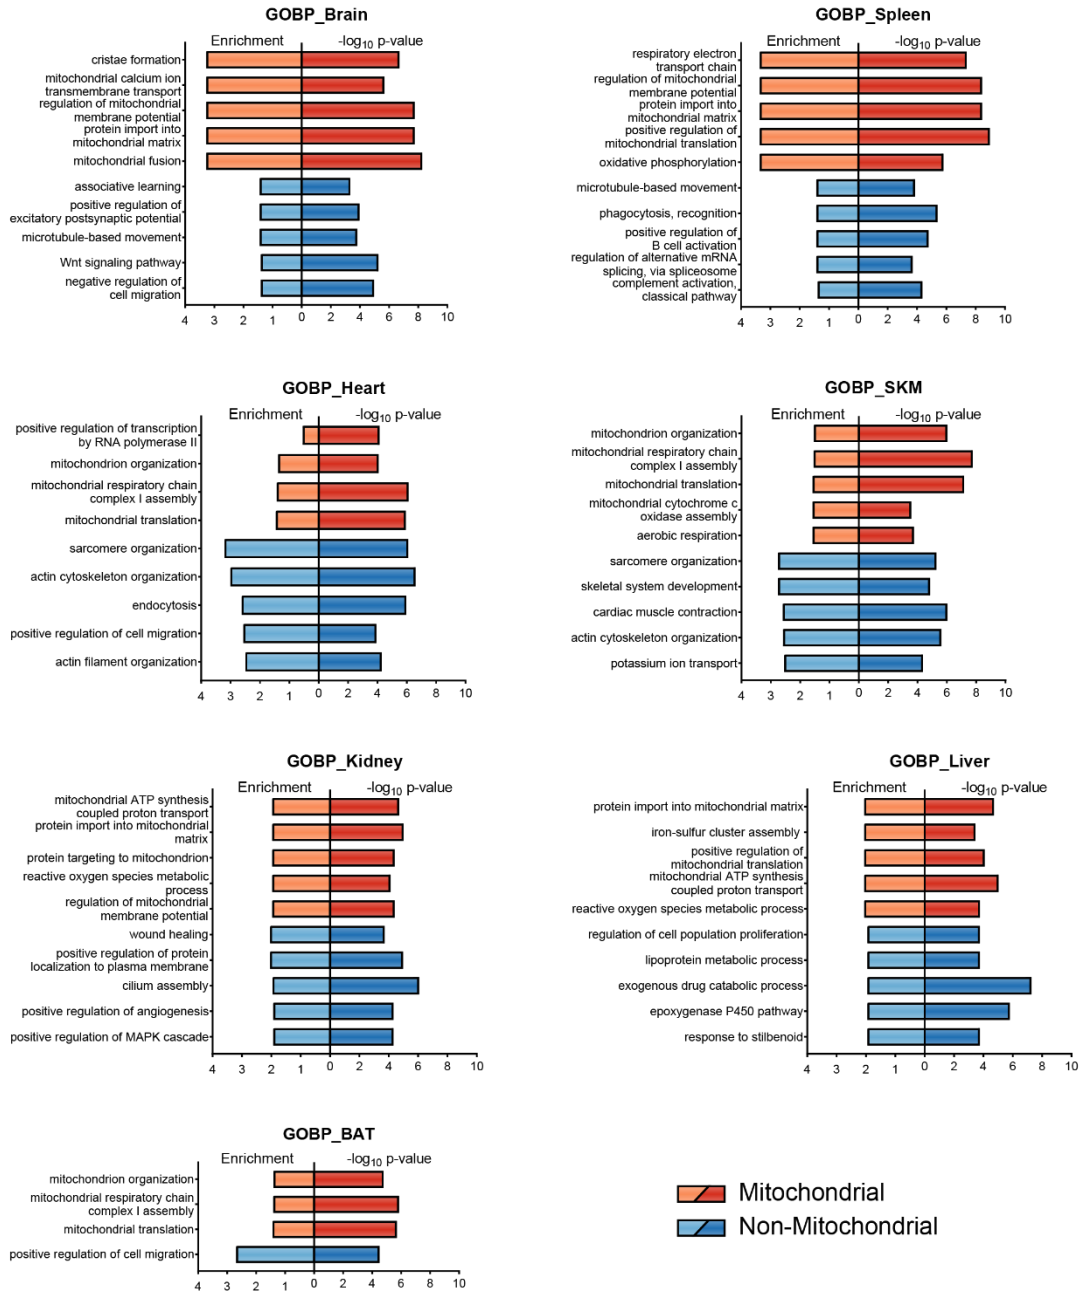

**Figure 4 – figure supplement 1 Gene Ontology enrichment displays tissue specificity**

Gene Ontology biological process (GOBP) enrichment for mitochondrial (orange) and non-mitochondrial (blue) proteins. Enrichment analysis was performed in Perseus (1.6.7.0) against the set of identified proteins in the corresponding tissue and the results were filtered for an intersection size >10 and the top 5 enriched terms of each tissue are displayed (Figure 4 – Source Data 1). Skeletal muscle (SKM), brown adipose tissue (BAT).

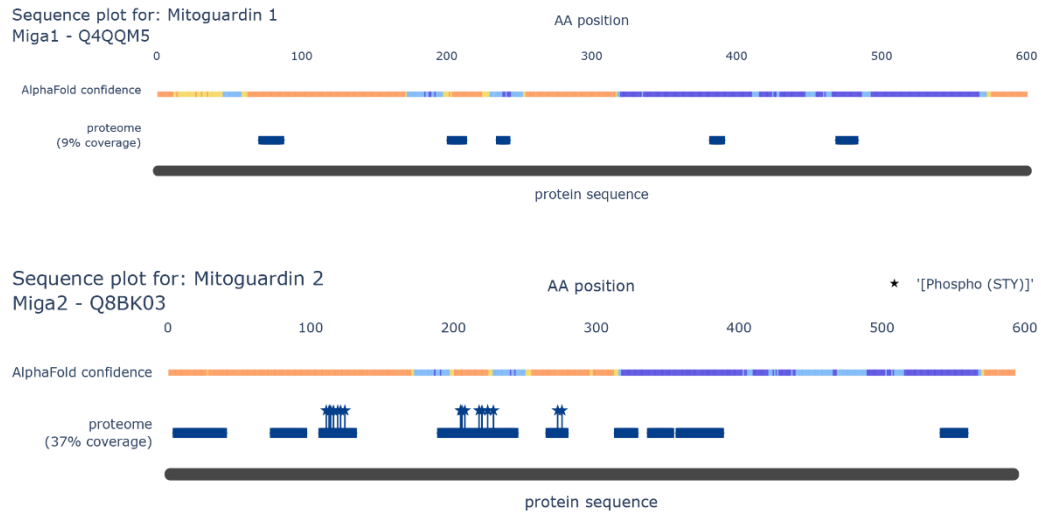

**Figure 6 – figure supplement 1 Sequence annotation highlights phosphorylation clusters on MIGA2**

Sequence plot of MIGA1 (top panel) and MIGA2 (bottom panel) show structural information (AlphaFold confidence scores) and protein coverage based on identified peptides. All identified STY sites are marked with a star.

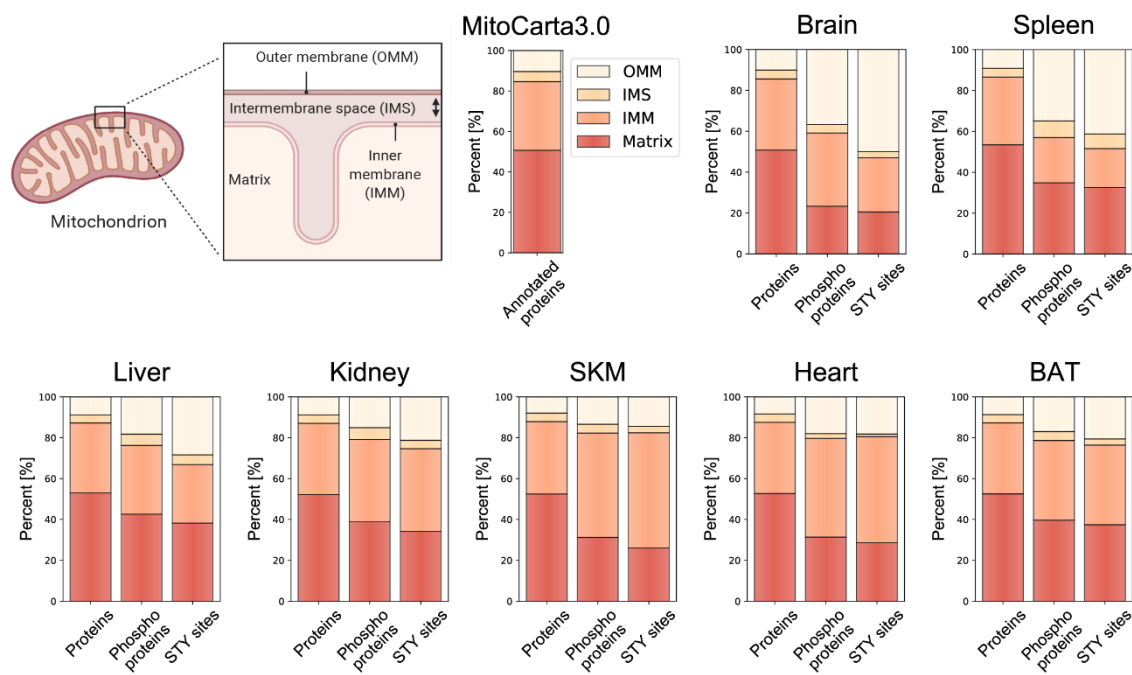

**Figure 6 – figure supplement 2 Localization distribution of mitochondrial phosphoproteome diverges from mitochondrial proteome**

(A) Scheme of a mitochondrion shows four different mitochondrial localizations – outer mitochondrial membrane (OMM), intermembrane space (IMS), inner mitochondrial membrane (IMM), Matrix – and the distribution of mitochondrial proteins contained in and classified by the MitoCarta3.0 database. Bar graphs for each individual tissue show the precentral distribution of mitochondrial proteins (left), phosphoproteins (middle) and STY sites (right) across different mitochondrial localizations. Fitting of OMM proportions to a beta-regression model shows significant differences between protein-phosphoprotein and protein-STY sites for all tissues (adjusted p-value <0.0001) (see Methods and Figure 6 – Source Data 1). Skeletal muscle (SKM), brown adipose tissue (BAT).

## **Supplemental information**

### **Mitochondrial phosphoproteomes are functionally specialized across tissues**

**Fynn M. Hansen, Laura S. Kremer, Ozge Karayel, Inge Köhl, Isabell Bludau, Nils-Göran Larsson, Matthias Mann**

### Supplementary Table 1 Overview of mitochondrial phosphoproteome studies in mammalian tissue

The table was adapted and extended from Kruse et al. (Kruse and Hojlund, 2017).

| Strategy                                                         | Species | Tissue                                 | Phosphoproteins and phosphorylation sites identified                                | Reference                                   |
|------------------------------------------------------------------|---------|----------------------------------------|-------------------------------------------------------------------------------------|---------------------------------------------|
| 2-DE-ProQ staining-MS                                            | Bovine  | Heart                                  | 13 phosphoproteins                                                                  | <a href="#">(Schulenberg et al., 2003)</a>  |
| 2-DE-ProQ staining-MS or P32 labelling-2-DE-MS                   | Pig     | Heart                                  | 45 phosphoproteins                                                                  | <a href="#">(Hopper et al., 2006)</a>       |
| IMAC-MS/MS/MS                                                    | Mouse   | Liver                                  | 84 phosphorylation sites in 62 distinct proteins                                    | <a href="#">(Lee et al., 2007)</a>          |
| 2D-BN-PAGE-phos—anti-Ser/Thr/Tyr Ab-MS<br>SCX/IMAC-LC-MS/MS      | Rat     | Heart                                  | 2-DE: 45 phosphoproteins LC-MS/MS: 26 phosphorylation sites in 19 distinct proteins | <a href="#">(Feng et al., 2008)</a>         |
| Anti-Tyr Ab-MS                                                   | Rat     | Brain                                  | 7 tyrosine-phosphorylation sites in 7 distinct proteins                             | <a href="#">(Lewandrowski et al., 2008)</a> |
| 32-P labelling/phos-tag<br>540 gel staining-2-DE-MS              | Pig     | Liver,<br>Heart                        | 68 phosphoproteins                                                                  | <a href="#">(Aponte et al., 2009)</a>       |
| iTRAQ labelling-<br>SCX/HILIC/TiO <sub>2</sub> -LC-<br>MS/MS-HCD | Pig     | Heart                                  | 56 phosphorylation sites in 38 distinct proteins                                    | <a href="#">(Boja et al., 2009)</a>         |
| IMAC/TiO <sub>2</sub> -2D-nano LC-<br>MS/MS                      | Rat     | INS-1 $\beta$<br>cells                 | 84 distinct phosphoproteins                                                         | <a href="#">(Cui et al., 2010)</a>          |
| SAX/SCX-LC-MS/MS                                                 | Rat     | Liver                                  | 447 phosphorylation sites in 228 distinct proteins                                  | <a href="#">(Deng et al., 2010)</a>         |
| SDS-PAGE-TiO <sub>2</sub> -LC-<br>MS/MS                          | Mouse   | Heart                                  | 236 phosphorylation sites in 181 distinct proteins                                  | <a href="#">(Deng et al., 2011)</a>         |
| SDS-PAGE-<br>TiO <sub>2</sub> /CPP/HILIC-LC-<br>MS/MS            | Human   | Muscle                                 | 155 phosphorylation sites in 77 distinct proteins                                   | <a href="#">(Zhao et al., 2011)</a>         |
| IMAC-SCX-nano-LC-<br>MS/MS                                       | Mouse   | Liver                                  | 811 phosphosites in 295 distinct proteins                                           | <a href="#">(Grimsrud et al., 2012)</a>     |
| TiO <sub>2</sub> -HILIC-LC-MS/MS                                 | Rat     | Liver,<br>Heart,<br>Skeletal<br>muscle | 899 phosphorylation sites in 354 distinct proteins                                  | <a href="#">(Bak et al., 2013)</a>          |
| TiO <sub>2</sub> -HILIC-LC-MS/MS                                 | Human   | Skeletal<br>muscle                     | 207 phosphorylation sites in 95 distinct proteins                                   | <a href="#">(Zhao et al., 2014)</a>         |
| iTRAQ labelling-TiO <sub>2</sub> -LC-<br>MS/MS                   | Human   | Ovary                                  | 124 phosphorylation sites in 67 distinct proteins                                   | <a href="#">(Li et al., 2019)</a>           |
| Anti-Tyr Ab-MS                                                   | Mouse   | Liver                                  | 79 tyrosine-phosphorylated mitochondrial proteins                                   | <a href="#">(Guedouari et al., 2020)</a>    |
| TMT labeling - IMAC-LC-<br>MS/MS                                 | Human   | Skeletal<br>muscle                     | 480 phosphopeptides that correspond to 196 proteins                                 | <a href="#">(Sathe et al., 2021)</a>        |
